# Supplementary material
Source: PubMed Central journal article supplement (PMC6529664)

1 **Supplemental Figure 1:** Principal components analysis for  $\beta$ -diversity of microbiome samples  
2 across time points for young/adolescent (Y/ADO) and adult/aged (AD/AG) groups. Each point  
3 denotes the value for an individual sample.

4 **Supplemental Figure 2:** Distribution of OTU reads in each age group across all time points. Each  
5 point denotes the percentage coverage of the top 50 OTUs (**LEFT**) or 100 OTUs (**RIGHT**) in the  
6 samples. The horizontal line denotes the mean percent coverage for the group samples.

7 **Supplemental Figure 3:** Flow chart of study design for ligature-induced periodontitis and microbiome  
8 sampling.

9

10 **Supplemental Table 1:** Sequence and  $\alpha$ -diversity data for microbiome samples

11

| <b>Sequence Measure</b> | <b>Young/Adolescent<br/>Median(min, max)</b> | <b>Adult/Aged<br/>Median (min, max)</b> |
|-------------------------|----------------------------------------------|-----------------------------------------|
| Raw reads               | 136023 (23026, 179875)                       | 142580 (43991, 234369)                  |
| Unique sequences        | 760 (0, 1450)                                | 1100 (0, 2450)                          |
| Phylotypes              | 148 (85, 182)                                | 229 (166, 285)                          |
| Shannon index           | 3.01 (2.25, 3.65)                            | 3.80 (3.05, 4.10)                       |
| Inverse Shannon index   | 11.0 (4.5, 22.0)                             | 23.5 (4.0, 35.0)                        |
| Chao 1                  | 180.0 (20.0, 225.0)                          | 240.0 (175.0, 315.0)                    |
| ACE                     | 180.0 (85.0, 235.0)                          | 240.0 (180.0, 305.0)                    |

12

13

14 |

15 **Supplemental Table 2.** OTU distribution in samples from Young group.

| OTU ID                                     | Baseline |       | 0.5  |      | 1    |      | 3    |      | 5    |      |
|--------------------------------------------|----------|-------|------|------|------|------|------|------|------|------|
|                                            | Mean     | SD    | Mean | SD   | Mean | SD   | Mean | SD   | Mean | SD   |
| Abiotrophia defectiva_oral_taxon_389       | 2658     | 628   | 64   | 58   | 852  | 142  | 132  | 186  | 2026 | 2403 |
| Actinobaculum sp._oral_taxon_183           | 12       | 4     | 64   | 108  | 55   | 47   | 237  | 193  | 653  | 880  |
| Actinomyces                                | 271      | 360   | 67   | 29   | 139  | 105  | 111  | 53   | 1312 | 304  |
| Actinomyces sp._oral_taxon_171             |          |       |      |      |      |      |      |      |      |      |
| Actinomyces sp._oral_taxon_179             | 0        | 0     | 28   | 48   | 0    | 0    | 529  | 884  | 0    | 0    |
| Actinomyces sp._oral_taxon_180             |          |       |      |      |      |      |      |      |      |      |
| Actinomyces sp._oral_taxon_449             |          |       |      |      |      |      |      |      |      |      |
| Aggregatibacter_unclassified               | 179      | 183   | 202  | 164  | 218  | 83   | 94   | 49   | 2785 | 3131 |
| Aggregatibacter                            |          |       |      |      |      |      |      |      |      |      |
| actinomycetemcomitans_oral_taxon_531       | 11332    | 15617 | 1989 | 2824 | 279  | 175  | 1425 | 659  | 1626 | 566  |
| Aggregatibacter sp._oral_taxon_458         |          |       |      |      |      |      |      |      |      |      |
| Aggregatibacter sp._oral_taxon_513         | 473      | 668   | 1    | 1    | 16   | 14   | 7    | 6    | 0    | 0    |
| Alloprevotella_unclassified                |          |       |      |      |      |      |      |      |      |      |
| Alloprevotella rava_oral_taxon_302         |          |       |      |      |      |      |      |      |      |      |
| Alloprevotella sp._oral_taxon_308          |          |       |      |      |      |      |      |      |      |      |
| Alloprevotella sp._oral_taxon_473          | 1652     | 2121  | 273  | 133  | 865  | 1220 | 111  | 102  | 58   | 80   |
| Alloprevotella sp._oral_taxon_912          | 1        | 1     | 23   | 19   | 200  | 266  | 256  | 308  | 291  | 406  |
| Alloprevotella tanneriae_oral_taxon_466    | 0        | 0     | 755  | 1305 | 90   | 127  | 22   | 38   | 1    | 1    |
| Atopobium_unclassified                     |          |       |      |      |      |      |      |      |      |      |
| Atopobium parvulum_oral_taxon_723          | 0        | 0     | 784  | 1094 | 400  | 564  | 67   | 88   | 0    | 0    |
| Atopobium sp._oral_taxon_199               | 1        | 1     | 853  | 1477 | 374  | 529  | 122  | 208  | 0    | 0    |
| Atopobium sp._oral_taxon_810               |          |       |      |      |      |      |      |      |      |      |
| Bacteria_unclassified                      | 98       | 42    | 84   | 85   | 147  | 61   | 1754 | 541  | 890  | 1254 |
| Bacteroidaceae [G-1] sp._oral_taxon_272    |          |       |      |      |      |      |      |      |      |      |
| Bacteroidales [G-2]sp._oral_taxon_274      | 5        | 5     | 133  | 114  | 1187 | 90   | 836  | 663  | 5    | 7    |
| Bacteroidales_unclassified                 |          |       |      |      |      |      |      |      |      |      |
| Bacteroides_unclassified                   |          |       |      |      |      |      |      |      |      |      |
| Bacteroides heparinolyticus_oral_taxon_630 | 0        | 0     | 6    | 10   | 144  | 204  | 780  | 223  | 0    | 0    |
| Bacteroides tectus_oral_taxon_787          |          |       |      |      |      |      |      |      |      |      |
| Bacteroides zoogloformans_oral_taxon_465   |          |       |      |      |      |      |      |      |      |      |
| Bacteroidetes [G-3]                        |          |       |      |      |      |      |      |      |      |      |
| Bacteroidetes [G-3]sp._oral_taxon_280      | 1        | 1     | 95   | 165  | 61   | 83   | 1070 | 1852 | 1    | 1    |
| Bacteroidetes [G-3]sp._oral_taxon_365      |          |       |      |      |      |      |      |      |      |      |
| Bacteroidetes [G-3]sp._oral_taxon_436      |          |       |      |      |      |      |      |      |      |      |
| Bacteroidetes [G-3]sp._oral_taxon_503      |          |       |      |      |      |      |      |      |      |      |
| Bacteroidetes [G-4]sp._oral_taxon_509      |          |       |      |      |      |      |      |      |      |      |
| Bacteroidetes [G-5]sp._oral_taxon_505      | 15       | 21    | 302  | 494  | 229  | 323  | 861  | 735  | 0    | 0    |
| Bacteroidetes [G-5]sp._oral_taxon_507      |          |       |      |      |      |      |      |      |      |      |
| Bacteroidetes [G-5]sp._oral_taxon_511      | 1        | 1     | 125  | 214  | 72   | 102  | 453  | 705  | 0    | 0    |
| Bacteroidetes_unclassified                 |          |       |      |      |      |      |      |      |      |      |
| Bergeyella_unclassified                    | 209      | 72    | 4    | 4    | 1    | 1    | 16   | 25   | 593  | 219  |
| Bergeyellasp._oral_taxon_907               | 17       | 22    | 5    | 5    | 179  | 106  | 137  | 118  | 235  | 290  |
| Burkholderiaceae_unclassified              |          |       |      |      |      |      |      |      |      |      |
| Burkholderiales_unclassified               |          |       |      |      |      |      |      |      |      |      |
| Butyrivibriosp._oral_taxon_094             | 0        | 0     | 27   | 47   | 0    | 0    | 391  | 675  | 2    | 1    |
| Campylobacter_unclassified                 | 11       | 16    | 121  | 181  | 52   | 14   | 128  | 82   | 50   | 71   |
| Campylobacter concisus_oral_taxon_575      |          |       |      |      |      |      |      |      |      |      |
| Campylobacter rectus_oral_taxon_748        | 22       | 30    | 233  | 39   | 580  | 313  | 628  | 486  | 2    | 1    |
| Campylobacter sp._oral_taxon_044           | 0        | 0     | 1    | 1    | 100  | 141  | 168  | 290  | 1    | 1    |
| Capnocytophaga_unclassified                | 216      | 209   | 311  | 370  | 847  | 803  | 969  | 738  | 3592 | 4209 |
| Capnocytophaga granulosa_oral_taxon_325    | 91       | 127   | 4    | 2    | 249  | 177  | 163  | 121  | 87   | 77   |
| Capnocytophagasp._oral_taxon_326           | 0        | 0     | 0    | 1    | 1    | 0    | 11   | 18   | 235  | 332  |
| Cardiobacterium_unclassified               |          |       |      |      |      |      |      |      |      |      |
| Cardiobacterium hominis_oral_taxon_633     |          |       |      |      |      |      |      |      |      |      |
| Cardiobacterium valvulum_oral_taxon_540    |          |       |      |      |      |      |      |      |      |      |
| Catonella morbi_oral_taxon_165             | 205      | 283   | 391  | 210  | 496  | 496  | 864  | 626  | 70   | 8    |
| Catonella sp._oral_taxon_451               |          |       |      |      |      |      |      |      |      |      |
| Chloroflexi [G-1]sp._oral_taxon_439        | 1        | 1     | 2    | 2    | 3    | 2    | 1857 | 1763 | 2    | 3    |
| Clostridiales [F-1][G-1]sp._oral_taxon_093 |          |       |      |      |      |      |      |      |      |      |

|                                                     |       |      |      |      |       |       |       |      |       |       |
|-----------------------------------------------------|-------|------|------|------|-------|-------|-------|------|-------|-------|
| Clostridiales [F-1][G-2]sp.oral_taxon_402           |       |      |      |      |       |       |       |      |       |       |
| Clostridiales [F-2][G-1]sp.oral_taxon_075           |       |      |      |      |       |       |       |      |       |       |
| Clostridiales [F-2][G-2]sp.oral_taxon_085           |       |      |      |      |       |       |       |      |       |       |
| Clostridiales [F-2][G-3]sp.oral_taxon_381           |       |      |      |      |       |       |       |      |       |       |
| Clostridiales [F-2]_unclassified                    |       |      |      |      |       |       |       |      |       |       |
| Clostridiales_unclassified                          | 300   | 350  | 59   | 92   | 113   | 54    | 304   | 119  | 742   | 1047  |
| Comomonadaceae_unclassified                         |       |      |      |      |       |       |       |      |       |       |
| Coriobacteriaceae_unclassified                      | 4     | 4    | 1    | 1    | 34    | 47    | 96    | 166  | 132   | 89    |
| Corynebacterium durum_oral_taxon_595                | 0     | 0    | 33   | 52   | 272   | 194   | 766   | 345  | 1     | 1     |
| Corynebacterium matruchotii_oral_taxon_666          |       |      |      |      |       |       |       |      |       |       |
| Desulfobulbus sp.oral_taxon_041                     |       |      |      |      |       |       |       |      |       |       |
| Desulfomicrobium orale_oral_taxon_703               |       |      |      |      |       |       |       |      |       |       |
| Desulfovibrio fairfieldensis_oral_taxon_605         |       |      |      |      |       |       |       |      |       |       |
| Desulfovibrio sp.oral_taxon_040                     |       |      |      |      |       |       |       |      |       |       |
| Dialister invisus_oral_taxon_118                    | 1     | 1    | 574  | 615  | 80    | 45    | 380   | 135  | 1     | 1     |
| Eikenella_unclassified                              |       |      |      |      |       |       |       |      |       |       |
| Eikenella corrodens_oral_taxon_577                  | 220   | 82   | 32   | 30   | 14    | 18    | 51    | 31   | 249   | 346   |
| Erysipelotrichaceae_unclassified                    |       |      |      |      |       |       |       |      |       |       |
| Escherichiacoli_oral_taxon_574                      | 993   | 281  | 38   | 29   | 36    | 6     | 77    | 10   | 284   | 332   |
| Eubacterium [XI][G-1]infirum_oral_taxon_105         | 2     | 1    | 2116 | 1503 | 671   | 43    | 725   | 252  | 1     | 1     |
| Eubacterium [XI][G-3]brachy_oral_taxon_557          | 8     | 1    | 428  | 364  | 552   | 585   | 155   | 127  | 20    | 28    |
| Eubacterium [XI][G-6]                               |       |      |      |      |       |       |       |      |       |       |
| Eubacterium [XI][G-6]minutum_oral_taxon_673         |       |      |      |      |       |       |       |      |       |       |
| Filifactor alocis_oral_taxon_539                    | 1     | 1    | 5    | 6    | 207   | 291   | 215   | 248  | 1     | 1     |
| Firmicutes_unclassified                             | 7     | 8    | 24   | 33   | 1     | 1     | 405   | 536  | 73    | 103   |
| Fretibacterium_unclassified                         | 19    | 27   | 349  | 476  | 837   | 1010  | 10347 | 699  | 0     | 0     |
| Fretibacterium fastidiosum_oral_taxon_363           | 8     | 11   | 297  | 497  | 206   | 287   | 2175  | 1111 | 12    | 14    |
| Fretibacterium sp.oral_taxon_361                    | 21    | 14   | 72   | 107  | 3184  | 4501  | 627   | 560  | 9     | 8     |
| Fusobacterium_unclassified                          | 4956  | 4504 | 7078 | 771  | 10217 | 13518 | 9817  | 3441 | 3206  | 2285  |
| Fusobacterium nucleatum ss_vincentii_oral_taxon_200 | 16    | 19   | 517  | 887  | 2     | 2     | 369   | 605  | 96    | 97    |
| Fusobacterium periodonticum_oral_taxon_201          |       |      |      |      |       |       |       |      |       |       |
| Fusobacterium sp.oral_taxon_203                     | 1     | 0    | 2    | 2    | 3985  | 5620  | 7     | 6    | 11513 | 10135 |
| Gemella morbillorum_oral_taxon_046                  | 5585  | 1341 | 165  | 78   | 1927  | 1867  | 486   | 478  | 5822  | 1564  |
| Haemophilus_unclassified                            | 106   | 51   | 14   | 23   | 5     | 2     | 52    | 10   | 168   | 170   |
| Haemophilussp.oral_taxon_035                        | 10624 | 4038 | 129  | 91   | 76    | 100   | 46    | 56   | 1835  | 1304  |
| Helicobacterpylori_oral_taxon_812                   |       |      |      |      |       |       |       |      |       |       |
| Johnsonellaignava_oral_taxon_635                    | 10    | 14   | 21   | 11   | 318   | 211   | 119   | 47   | 36    | 51    |
| Johnsonellasp.oral_taxon_166                        | 12    | 16   | 8    | 11   | 20    | 28    | 214   | 314  | 0     | 0     |
| Kingella sp.oral_taxon_459                          |       |      |      |      |       |       |       |      |       |       |
| Lachnoanaerobaculum_unclassified                    | 0     | 0    | 0    | 0    | 195   | 269   | 41    | 72   | 18    | 25    |
| Lachnoanaerobaculumsp.oral_taxon_083                | 1     | 1    | 110  | 188  | 38    | 53    | 156   | 64   | 2     | 3     |
| Lachnoanaerobaculumsp.oral_taxon_496                |       |      |      |      |       |       |       |      |       |       |
| Lachnoanaerobaculum umeaense_oral_taxon_107         | 0     | 0    | 144  | 4    | 33    | 37    | 19    | 11   | 3     | 4     |
| Lachnospiraceae [G-2]_unclassified                  | 567   | 718  | 6    | 4    | 150   | 207   | 9     | 10   | 343   | 322   |
| Lachnospiraceae [G-2]sp.oral_taxon_088              | 63    | 14   | 63   | 87   | 435   | 112   | 232   | 97   | 752   | 542   |
| Lachnospiraceae [G-2]sp.oral_taxon_096              |       |      |      |      |       |       |       |      |       |       |
| Lachnospiraceae [G-3]sp.oral_taxon_100              | 14    | 3    | 23   | 32   | 405   | 443   | 688   | 463  | 55    | 16    |
| Lachnospiraceae [G-5]sp.oral_taxon_080              |       |      |      |      |       |       |       |      |       |       |
| Lachnospiraceae [G-6]sp.oral_taxon_090              |       |      |      |      |       |       |       |      |       |       |
| Lachnospiraceae [G-8]sp.oral_taxon_500              | 10    | 14   | 178  | 293  | 28    | 38    | 421   | 618  | 1     | 1     |
| Lachnospiraceae [XIVa]_unclassified                 | 18    | 12   | 69   | 117  | 45    | 28    | 209   | 258  | 476   | 672   |
| Lactobacillales_unclassified                        | 520   | 214  | 15   | 18   | 1     | 1     | 12    | 10   | 721   | 179   |
| Lactobacillus                                       |       |      |      |      |       |       |       |      |       |       |
| Lactobacillus [XVII] catenaformis_oral_taxon_569    |       |      |      |      |       |       |       |      |       |       |
| Lactobacillus gasseri_oral_taxon_615                |       |      |      |      |       |       |       |      |       |       |
| Lactobacillus salivarius_oral_taxon_756             | 59    | 29   | 21   | 15   | 0     | 0     | 2     | 3    | 290   | 410   |
| Lactobacillus sp.oral_taxon_052                     |       |      |      |      |       |       |       |      |       |       |

|                                                      |       |       |      |       |       |      |       |       |      |      |
|------------------------------------------------------|-------|-------|------|-------|-------|------|-------|-------|------|------|
| Lactobacillus vaginalis_oral_taxon_051               |       |       |      |       |       |      |       |       |      |      |
| Leptotrichia_unclassified                            | 2487  | 512   | 568  | 233   | 10565 | 9915 | 5046  | 3965  | 6641 | 2360 |
| Leptotrichia goodfellowii_oral_taxon_845             | 21    | 30    | 369  | 568   | 4     | 3    | 2     | 2     | 499  | 517  |
| Leptotrichia hongkongensis_oral_taxon_213            | 2     | 1     | 0    | 1     | 0     | 0    | 526   | 912   | 0    | 0    |
| Leptotrichia sp._oral_taxon_212                      | 17    | 23    | 68   | 113   | 29    | 15   | 70    | 52    | 8956 | 7326 |
| Leptotrichia sp._oral_taxon_223                      | 1     | 1     | 488  | 669   | 43    | 60   | 616   | 1066  | 14   | 19   |
| Leptotrichia sp._oral_taxon_225                      | 3     | 2     | 21   | 17    | 2     | 3    | 47    | 77    | 163  | 206  |
| Leptotrichia sp._oral_taxon_392                      |       |       |      |       |       |      |       |       |      |      |
| Leptotrichia sp._oral_taxon_498                      |       |       |      |       |       |      |       |       |      |      |
| Leptotrichia sp._oral_taxon_847                      |       |       |      |       |       |      |       |       |      |      |
| Leptotrichiaceae_unclassified                        | 113   | 83    | 1    | 2     | 2     | 3    | 2     | 2     | 259  | 344  |
| Megasphaera                                          |       |       |      |       |       |      |       |       |      |      |
| Megasphaera micronuciformis_oral_taxon_122           |       |       |      |       |       |      |       |       |      |      |
| Mitsuokella sp._oral_taxon_131                       |       |       |      |       |       |      |       |       |      |      |
| Mitsuokella sp._oral_taxon_521                       |       |       |      |       |       |      |       |       |      |      |
| Mogibacterium timidum_oral_taxon_042                 |       |       |      |       |       |      |       |       |      |      |
| Mogibacterium vescum_oral_taxon_008                  | 0     | 0     | 108  | 90    | 78    | 18   | 48    | 40    | 0    | 0    |
| Mollicutes_[G-1] sp._oral_taxon_504                  |       |       |      |       |       |      |       |       |      |      |
| Mollicutes_[G-2] sp._oral_taxon_906                  |       |       |      |       |       |      |       |       |      |      |
| Moraxella catarrhalis_oral_taxon_833                 | 6182  | 7598  | 10   | 16    | 0     | 0    | 9     | 14    | 4    | 6    |
| Moryella sp._oral_taxon_097                          |       |       |      |       |       |      |       |       |      |      |
| Moryella sp._oral_taxon_373                          |       |       |      |       |       |      |       |       |      |      |
| Mycoplasma                                           | 10    | 13    | 87   | 31    | 27    | 31   | 216   | 271   | 5    | 6    |
| Neisseria_unclassified                               | 11310 | 13863 | 33   | 53    | 2     | 0    | 2     | 3     | 13   | 2    |
| Neisseriaceae_unclassified                           | 985   | 1391  | 1    | 1     | 66    | 59   | 27    | 46    | 78   | 110  |
| Neisseria oralis_oral_taxon_014                      | 362   | 430   | 4    | 4     | 61    | 64   | 235   | 406   | 6204 | 3586 |
| Olsenella sp._oral_taxon_807                         |       |       |      |       |       |      |       |       |      |      |
| Oribacterium                                         | 3     | 4     | 1032 | 982   | 63    | 30   | 48    | 47    | 67   | 93   |
| Oribacterium sp._oral_taxon_078                      | 7     | 10    | 167  | 122   | 5     | 5    | 42    | 38    | 21   | 30   |
| Oribacterium sp._oral_taxon_102                      |       |       |      |       |       |      |       |       |      |      |
| Parvimonas_unclassified                              | 2     | 1     | 591  | 930   | 726   | 993  | 336   | 560   | 78   | 110  |
| Parvimonas micra_oral_taxon_111                      | 0     | 0     | 1396 | 1584  | 359   | 495  | 656   | 1018  | 4    | 0    |
| Pasteurellaceae_unclassified                         | 13790 | 4966  | 430  | 210   | 1950  | 1850 | 297   | 284   | 3514 | 2072 |
| Peptococcus sp._oral_taxon_167                       | 14    | 18    | 304  | 99    | 291   | 291  | 359   | 297   | 21   | 25   |
| Peptostreptococcaceae_[XI][G-1] sp._oral_taxon_383   |       |       |      |       |       |      |       |       |      |      |
| Peptostreptococcaceae_[XI][G-2] sp._oral_taxon_091   |       |       |      |       |       |      |       |       |      |      |
| Peptostreptococcaceae_[XI][G-4]                      | 0     | 0     | 56   | 94    | 3     | 2    | 302   | 117   | 0    | 0    |
| Peptostreptococcaceae_[XI][G-5] sp._oral_taxon_493   | 2     | 1     | 75   | 129   | 0     | 0    | 119   | 206   | 2    | 2    |
| Peptostreptococcaceae_[XI][G-7] sp._oral_taxon_081   |       |       |      |       |       |      |       |       |      |      |
| Peptostreptococcaceae_[XI]_unclassified              | 21    | 20    | 77   | 39    | 155   | 112  | 284   | 205   | 43   | 28   |
| Peptostreptococcaceae_[XIII][G-1] sp._oral_taxon_113 |       |       |      |       |       |      |       |       |      |      |
| Peptostreptococcaceae_[XIII][G-2] sp._oral_taxon_790 | 0     | 0     | 0    | 1     | 54    | 76   | 155   | 206   | 0    | 0    |
| Peptostreptococcaceae_[XIII]_unclassified            |       |       |      |       |       |      |       |       |      |      |
| Peptostreptococcus stomatis_oral_taxon_112           | 0     | 0     | 234  | 199   | 24    | 32   | 233   | 165   | 0    | 0    |
| Porphyromonadaceae_unclassified                      |       |       |      |       |       |      |       |       |      |      |
| Porphyromonas_unclassified                           | 754   | 383   | 23   | 14    | 50    | 69   | 48    | 50    | 731  | 1031 |
| Porphyromonas catoniae_oral_taxon_283                |       |       |      |       |       |      |       |       |      |      |
| Porphyromonas endodontalis_oral_taxon_273            | 15    | 8     | 836  | 1123  | 4781  | 2353 | 2338  | 2068  | 1    | 1    |
| Porphyromonas gingivalis_oral_taxon_619              | 3     | 2     | 417  | 714   | 5     | 1    | 11055 | 14239 | 3    | 4    |
| Porphyromonas sp._oral_taxon_279                     | 4998  | 4282  | 232  | 142   | 1041  | 85   | 429   | 323   | 9743 | 2351 |
| Prevotella_unclassified                              | 243   | 127   | 2259 | 2921  | 606   | 625  | 1823  | 2778  | 1828 | 2341 |
| Prevotella baroniae_oral_taxon_553                   |       |       |      |       |       |      |       |       |      |      |
| Prevotella buccae_oral_taxon_560                     | 0     | 0     | 2312 | 1772  | 291   | 217  | 123   | 169   | 1    | 1    |
| Prevotellaceae_unclassified                          | 186   | 258   | 9718 | 10335 | 3188  | 1164 | 2212  | 957   | 11   | 11   |
| Prevotella dentalis_oral_taxon_583                   | 118   | 166   | 7309 | 3175  | 1214  | 1712 | 2518  | 2317  | 4    | 4    |
| Prevotella denticola_oral_taxon_291                  |       |       |      |       |       |      |       |       |      |      |

|                                                   |       |       |      |      |       |      |      |      |      |       |
|---------------------------------------------------|-------|-------|------|------|-------|------|------|------|------|-------|
| Prevotella enoeca_oral_taxon_600                  |       |       |      |      |       |      |      |      |      |       |
| Prevotella fusca_oral_taxon_782                   |       |       |      |      |       |      |      |      |      |       |
| Prevotella intermedia_oral_taxon_643              |       |       |      |      |       |      |      |      |      |       |
| Prevotella maculosa_oral_taxon_289                |       |       |      |      |       |      |      |      |      |       |
| Prevotella marshii_oral_taxon_665                 |       |       |      |      |       |      |      |      |      |       |
| Prevotella melaninogenica_oral_taxon_469          | 1     | 1     | 468  | 682  | 168   | 170  | 46   | 79   | 38   | 47    |
| Prevotella micans_oral_taxon_378                  |       |       |      |      |       |      |      |      |      |       |
| Prevotella nigrescens_oral_taxon_693              |       |       |      |      |       |      |      |      |      |       |
| Prevotella oralis_oral_taxon_705                  |       |       |      |      |       |      |      |      |      |       |
| Prevotella oris_oral_taxon_311                    |       |       |      |      |       |      |      |      |      |       |
| Prevotella oulorum_oral_taxon_288                 |       |       |      |      |       |      |      |      |      |       |
| Prevotella saccharolytica_oral_taxon_781          |       |       |      |      |       |      |      |      |      |       |
| Prevotella sp._oral_taxon_299                     | 242   | 342   | 1    | 1    | 0     | 0    | 5    | 5    | 27   | 37    |
| Prevotella sp._oral_taxon_300                     |       |       |      |      |       |      |      |      |      |       |
| Prevotella sp._oral_taxon_304                     | 3     | 4     | 743  | 673  | 12    | 17   | 2148 | 3717 | 2    | 2     |
| Prevotella sp._oral_taxon_313                     | 238   | 280   | 6035 | 4999 | 4720  | 2164 | 88   | 101  | 525  | 730   |
| Prevotella sp._oral_taxon_315                     |       |       |      |      |       |      |      |      |      |       |
| Prevotella sp._oral_taxon_317                     | 2     | 2     | 1078 | 1273 | 1404  | 1589 | 281  | 180  | 31   | 42    |
| Prevotella sp._oral_taxon_376                     |       |       |      |      |       |      |      |      |      |       |
| Prevotella sp._oral_taxon_443                     |       |       |      |      |       |      |      |      |      |       |
| Prevotella sp._oral_taxon_472                     |       |       |      |      |       |      |      |      |      |       |
| Prevotella sp._oral_taxon_515                     |       |       |      |      |       |      |      |      |      |       |
| Prevotella sp._oral_taxon_526                     | 1     | 1     | 291  | 503  | 2     | 3    | 474  | 515  | 4    | 1     |
| Prevotella sp._oral_taxon_820                     | 0     | 0     | 1285 | 696  | 185   | 259  | 509  | 731  | 1    | 1     |
| Prevotellaceae_unclassified                       |       |       |      |      |       |      |      |      |      |       |
| Proteobacteria_unclassified                       |       |       |      |      |       |      |      |      |      |       |
| Pyramidobacter pisciolens_oral_taxon_357          |       |       |      |      |       |      |      |      |      |       |
| Rothia_unclassified                               | 806   | 805   | 1    | 1    | 0     | 0    | 1    | 2    | 6    | 5     |
| Scardovia wiggisiae_oral_taxon_195                |       |       |      |      |       |      |      |      |      |       |
| Selenomonas_unclassified                          | 37    | 25    | 1240 | 1482 | 852   | 115  | 2731 | 1421 | 15   | 15    |
| Selenomonas dianaе_oral_taxon_139                 |       |       |      |      |       |      |      |      |      |       |
| Selenomonas sp._oral_taxon_501                    | 0     | 0     | 43   | 64   | 95    | 78   | 320  | 194  | 1    | 1     |
| Selenomonas sputigena_oral_taxon_151              | 25    | 1     | 908  | 1534 | 556   | 670  | 3233 | 2829 | 19   | 12    |
| Shuttleworthia satelles_oral_taxon_095            |       |       |      |      |       |      |      |      |      |       |
| Solobacterium moorei_oral_taxon_678               |       |       |      |      |       |      |      |      |      |       |
| SR1_[G-1]                                         |       |       |      |      |       |      |      |      |      |       |
| SR1_[G-1]sp._oral_taxon_345                       |       |       |      |      |       |      |      |      |      |       |
| SR1_[G-1]sp._oral_taxon_874                       |       |       |      |      |       |      |      |      |      |       |
| SR1_[G-1]sp._oral_taxon_875                       |       |       |      |      |       |      |      |      |      |       |
| Streptococcus_unclassified                        | 10421 | 7144  | 446  | 256  | 513   | 351  | 121  | 84   | 8409 | 10110 |
| Streptococcus anginosus_oral_taxon_543            |       |       |      |      |       |      |      |      |      |       |
| Streptococcus downei_oral_taxon_594               | 4     | 6     | 5352 | 4632 | 659   | 929  | 426  | 723  | 1111 | 1570  |
| Streptococcus mutans_oral_taxon_686               | 0     | 0     | 623  | 1079 | 1     | 1    | 16   | 21   | 1    | 1     |
| Streptococcus parasanguinis_II_oral_taxon_411     | 15047 | 15199 | 3074 | 2172 | 12745 | 1894 | 2546 | 2099 | 8185 | 6132  |
| Streptococcus sp._oral_taxon_058                  | 6150  | 6049  | 1719 | 1844 | 4730  | 6167 | 894  | 1449 | 2088 | 946   |
| Syntrophomonadaceae_[VIII][G-1]sp._oral_taxon_435 |       |       |      |      |       |      |      |      |      |       |
| Tannerella                                        |       |       |      |      |       |      |      |      |      |       |
| Tannerella forsythia_oral_taxon_613               | 14    | 19    | 122  | 109  | 346   | 486  | 871  | 702  | 2    | 2     |
| Tannerella sp._oral_taxon_286                     | 4     | 6     | 104  | 116  | 213   | 281  | 169  | 109  | 38   | 46    |
| Tannerella sp._oral_taxon_916                     |       |       |      |      |       |      |      |      |      |       |
| TM7_[G-3]sp._oral_taxon_351                       |       |       |      |      |       |      |      |      |      |       |
| Treponema_unclassified                            | 989   | 1374  | 2406 | 2611 | 1593  | 665  | 6196 | 5780 | 180  | 250   |
| Treponema amylovorum_oral_taxon_541               |       |       |      |      |       |      |      |      |      |       |
| Treponema denticola_oral_taxon_584                | 94    | 127   | 1504 | 2178 | 2701  | 1048 | 8168 | 5968 | 1    | 0     |
| Treponema lecithinolyticum_oral_taxon_653         | 94    | 132   | 164  | 141  | 936   | 1217 | 215  | 36   | 1    | 0     |
| Treponema maltophilum_oral_taxon_664              | 2     | 3     | 118  | 116  | 649   | 247  | 419  | 431  | 7    | 9     |
| Treponema parvum_oral_taxon_724                   |       |       |      |      |       |      |      |      |      |       |
| Treponema pectinovorum_oral_taxon_725             |       |       |      |      |       |      |      |      |      |       |
| Treponema socranskii_oral_taxon_769               | 0     | 0     | 2    | 3    | 145   | 194  | 271  | 462  | 0    | 0     |
| Treponema sp._oral_taxon_237                      |       |       |      |      |       |      |      |      |      |       |
| Treponema sp._oral_taxon_239                      |       |       |      |      |       |      |      |      |      |       |

|                                         |      |      |       |       |       |       |       |       |       |       |
|-----------------------------------------|------|------|-------|-------|-------|-------|-------|-------|-------|-------|
| Treponema sp._oral_taxon_242            |      |      |       |       |       |       |       |       |       |       |
| Treponema sp._oral_taxon_246            | 2785 | 3937 | 22    | 6     | 98    | 59    | 1540  | 1330  | 16    | 19    |
| Treponema sp._oral_taxon_249            |      |      |       |       |       |       |       |       |       |       |
| Treponema sp._oral_taxon_250            | 401  | 567  | 443   | 445   | 650   | 37    | 1516  | 466   | 1     | 1     |
| Treponema sp._oral_taxon_252            |      |      |       |       |       |       |       |       |       |       |
| Treponema sp._oral_taxon_254            |      |      |       |       |       |       |       |       |       |       |
| Treponema sp._oral_taxon_255            | 0    | 0    | 127   | 220   | 0     | 0     | 262   | 454   | 0     | 0     |
| Treponema sp._oral_taxon_257            |      |      |       |       |       |       |       |       |       |       |
| Treponema sp._oral_taxon_258            | 0    | 0    | 31    | 54    | 0     | 0     | 1024  | 1773  | 0     | 0     |
| Treponema sp._oral_taxon_263            |      |      |       |       |       |       |       |       |       |       |
| Treponema sp._oral_taxon_270            |      |      |       |       |       |       |       |       |       |       |
| Treponema sp._oral_taxon_271            |      |      |       |       |       |       |       |       |       |       |
| Treponema sp._oral_taxon_508            |      |      |       |       |       |       |       |       |       |       |
| Veillonella_unclassified                | 3816 | 28   | 15648 | 14879 | 39946 | 11165 | 16308 | 7177  | 20948 | 24522 |
| Veillonellaceae_[G-1]_unclassified      | 1    | 1    | 142   | 242   | 0     | 0     | 417   | 722   | 0     | 0     |
| Veillonellaceae_[G-1]sp._oral_taxon_129 |      |      |       |       |       |       |       |       |       |       |
| Veillonellaceae_[G-1]sp._oral_taxon_145 |      |      |       |       |       |       |       |       |       |       |
| Veillonellaceae_[G-1]sp._oral_taxon_155 |      |      |       |       |       |       |       |       |       |       |
| Veillonellaceae_unclassified            | 12   | 9    | 7     | 8     | 13    | 15    | 12    | 9     | 625   | 882   |
| Veillonella dispar_oral_taxon_160       | 0    | 0    | 159   | 140   | 225   | 296   | 65    | 111   | 1     | 1     |
| Veillonella parvula_oral_taxon_161      | 154  | 123  | 46837 | 6406  | 15577 | 16031 | 8759  | 13703 | 13784 | 19354 |
| Veillonella sp._oral_taxon_780          | 78   | 110  | 6     | 7     | 0     | 0     | 1     | 2     | 1108  | 1551  |

16  
17

18 **Supplemental Table 3.** OTU distribution in samples from Adolescent group.

| OTU ID                                               | Baseline |      | 0.5  |       | 1    |      | 3     |       | 5    |      |
|------------------------------------------------------|----------|------|------|-------|------|------|-------|-------|------|------|
|                                                      | Mean     | SD   | Mean | SD    | Mean | SD   | Mean  | SD    | Mean | SD   |
| Abiotrophia defectiva_oral_taxon_389                 | 1503     | 1745 | 113  | 159   | 147  | 84   | 145   | 184   | 959  | 887  |
| Actinobaculum sp._oral_taxon_183                     | 1        | 1    | 6    | 8     | 323  | 354  | 552   | 774   | 215  | 241  |
| Actinomyces                                          | 16       | 16   | 94   | 132   | 130  | 122  | 51    | 44    | 1109 | 440  |
| Actinomyces sp._oral_taxon_171                       |          |      |      |       |      |      |       |       |      |      |
| Actinomyces sp._oral_taxon_179                       |          |      |      |       |      |      |       |       |      |      |
| Actinomyces sp._oral_taxon_180                       |          |      |      |       |      |      |       |       |      |      |
| Actinomyces sp._oral_taxon_449                       |          |      |      |       |      |      |       |       |      |      |
| Aggregatibacter_unclassified                         | 133      | 122  | 1780 | 1881  | 19   | 20   | 48    | 42    | 576  | 495  |
| Aggregatibacter actinomycetemcomitans_oral_taxon_531 | 789      | 1008 | 9909 | 13695 | 1885 | 1799 | 10264 | 17697 | 2195 | 2722 |
| Aggregatibacter sp._oral_taxon_458                   |          |      |      |       |      |      |       |       |      |      |
| Aggregatibacter sp._oral_taxon_513                   | 240      | 333  | 42   | 8     | 196  | 188  | 4     | 4     | 1169 | 675  |
| Alloprevotella_unclassified                          |          |      |      |       |      |      |       |       |      |      |
| Alloprevotella rava_oral_taxon_302                   |          |      |      |       |      |      |       |       |      |      |
| Alloprevotella sp._oral_taxon_308                    | 0        | 0    | 0    | 0     | 246  | 389  | 0     | 0     | 3    | 4    |
| Alloprevotella sp._oral_taxon_473                    | 588      | 496  | 0    | 0     | 478  | 598  | 16    | 24    | 384  | 98   |
| Alloprevotella sp._oral_taxon_912                    | 1        | 1    | 0    | 0     | 37   | 33   | 522   | 821   | 114  | 104  |
| Alloprevotella tanneriae_oral_taxon_466              | 1        | 1    | 0    | 0     | 458  | 785  | 0     | 0     | 19   | 31   |
| Atopobium_unclassified                               |          |      |      |       |      |      |       |       |      |      |
| Atopobium parvulum_oral_taxon_723                    |          |      |      |       |      |      |       |       |      |      |
| Atopobium sp._oral_taxon_199                         | 0        | 0    | 563  | 795   | 202  | 293  | 29    | 48    | 13   | 23   |
| Atopobium sp._oral_taxon_810                         |          |      |      |       |      |      |       |       |      |      |
| Bacteria_unclassified                                | 83       | 50   | 156  | 220   | 1340 | 1173 | 166   | 279   | 719  | 573  |
| Bacteroidaceae [G-1] sp._oral_taxon_272              |          |      |      |       |      |      |       |       |      |      |
| Bacteroidales [G-2]sp._oral_taxon_274                | 0        | 0    | 338  | 477   | 375  | 97   | 16    | 25    | 706  | 629  |
| Bacteroidales_unclassified                           |          |      |      |       |      |      |       |       |      |      |
| Bacteroides_unclassified                             |          |      |      |       |      |      |       |       |      |      |
| Bacteroides heparinolyticus_oral_taxon_630           | 0        | 0    | 0    | 0     | 109  | 164  | 0     | 0     | 65   | 113  |
| Bacteroides tectus_oral_taxon_787                    |          |      |      |       |      |      |       |       |      |      |
| Bacteroides zoogloformans_oral_taxon_465             |          |      |      |       |      |      |       |       |      |      |
| Bacteroidetes [G-3]                                  | 0        | 0    | 0    | 0     | 293  | 507  | 0     | 0     | 43   | 74   |
| Bacteroidetes [G-3]sp._oral_taxon_280                |          |      |      |       |      |      |       |       |      |      |
| Bacteroidetes [G-3]sp._oral_taxon_365                |          |      |      |       |      |      |       |       |      |      |
| Bacteroidetes [G-3]sp._oral_taxon_436                |          |      |      |       |      |      |       |       |      |      |
| Bacteroidetes [G-3]sp._oral_taxon_503                |          |      |      |       |      |      |       |       |      |      |
| Bacteroidetes [G-4]sp._oral_taxon_509                |          |      |      |       |      |      |       |       |      |      |
| Bacteroidetes [G-5]sp._oral_taxon_505                | 1        | 1    | 0    | 0     | 260  | 234  | 0     | 0     | 0    | 1    |
| Bacteroidetes [G-5]sp._oral_taxon_507                |          |      |      |       |      |      |       |       |      |      |
| Bacteroidetes [G-5]sp._oral_taxon_511                | 0        | 0    | 0    | 0     | 301  | 204  | 0     | 0     | 0    | 0    |
| Bacteroidetes_unclassified                           |          |      |      |       |      |      |       |       |      |      |
| Bergeyella_unclassified                              | 101      | 80   | 788  | 1114  | 15   | 13   | 29    | 38    | 181  | 268  |
| Bergeyellasp._oral_taxon_907                         |          |      |      |       |      |      |       |       |      |      |
| Burkholderiaceae_unclassified                        | 0        | 0    | 0    | 0     | 5    | 8    | 39    | 44    | 243  | 329  |
| Burkholderiales_unclassified                         | 0        | 0    | 0    | 0     | 87   | 99   | 162   | 256   | 8    | 8    |
| Butyrivibriosp._oral_taxon_094                       |          |      |      |       |      |      |       |       |      |      |
| Campylobacter_unclassified                           | 6        | 8    | 0    | 0     | 48   | 46   | 105   | 178   | 265  | 455  |
| Campylobacter concisus_oral_taxon_575                |          |      |      |       |      |      |       |       |      |      |
| Campylobacter rectus_oral_taxon_748                  | 8        | 9    | 83   | 117   | 615  | 785  | 435   | 141   | 332  | 375  |
| Campylobacter sp._oral_taxon_044                     |          |      |      |       |      |      |       |       |      |      |
| Capnocytophaga_unclassified                          | 503      | 642  | 1913 | 2705  | 787  | 673  | 646   | 418   | 5990 | 2198 |
| Capnocytophaga granulosa_oral_taxon_325              | 6        | 8    | 0    | 0     | 52   | 67   | 256   | 443   | 2260 | 3498 |
| Capnocytophagasp._oral_taxon_326                     | 6        | 8    | 0    | 0     | 0    | 0    | 0     | 0     | 522  | 903  |
| Cardiobacterium_unclassified                         | 1        | 1    | 0    | 0     | 3    | 3    | 18    | 18    | 230  | 323  |
| Cardiobacterium hominis_oral_taxon_633               | 4        | 5    | 0    | 0     | 7    | 9    | 1     | 2     | 215  | 343  |
| Cardiobacterium valvulum_oral_taxon_540              |          |      |      |       |      |      |       |       |      |      |
| Catonella morbi_oral_taxon_165                       | 45       | 64   | 113  | 159   | 336  | 157  | 254   | 279   | 298  | 304  |
| Catonella sp._oral_taxon_451                         |          |      |      |       |      |      |       |       |      |      |
| Chloroflexi [G-1]sp._oral_taxon_439                  | 1        | 0    | 0    | 0     | 1226 | 1325 | 0     | 1     | 469  | 809  |
| Clostridiales [F-1][G-1]sp._oral_taxon_093           |          |      |      |       |      |      |       |       |      |      |



|                                                     |       |       |      |       |       |      |      |      |       |       |
|-----------------------------------------------------|-------|-------|------|-------|-------|------|------|------|-------|-------|
| Clostridiales [F-1][G-2]sp.oral_taxon_402           |       |       |      |       |       |      |      |      |       |       |
| Clostridiales [F-2][G-1]sp.oral_taxon_075           | 1     | 1     | 113  | 159   | 61    | 71   | 850  | 1470 | 266   | 325   |
| Clostridiales [F-2][G-2]sp.oral_taxon_085           | 0     | 0     | 113  | 159   | 130   | 111  | 0    | 0    | 418   | 708   |
| Clostridiales [F-2][G-3]sp.oral_taxon_381           |       |       |      |       |       |      |      |      |       |       |
| Clostridiales [F-2]_unclassified                    |       |       |      |       |       |      |      |      |       |       |
| Clostridiales_unclassified                          | 53    | 64    | 113  | 159   | 278   | 370  | 162  | 281  | 354   | 506   |
| Comomonadaceae_unclassified                         |       |       |      |       |       |      |      |      |       |       |
| Coriobacteriaceae_unclassified                      |       |       |      |       |       |      |      |      |       |       |
| Corynebacterium durum_oral_taxon_595                | 109   | 154   | 0    | 0     | 3     | 5    | 7    | 12   | 240   | 302   |
| Corynebacterium matruchotii_oral_taxon_666          | 2     | 3     | 113  | 159   | 2     | 0    | 0    | 1    | 2770  | 4782  |
| Desulfobulbus sp.oral_taxon_041                     | 1     | 1     | 0    | 0     | 426   | 639  | 0    | 0    | 117   | 199   |
| Desulfomicrobium orale_oral_taxon_703               |       |       |      |       |       |      |      |      |       |       |
| Desulfovibrio fairfieldensis_oral_taxon_605         | 0     | 0     | 788  | 1114  | 193   | 281  | 1089 | 639  | 15    | 26    |
| Desulfovibrio sp.oral_taxon_040                     |       |       |      |       |       |      |      |      |       |       |
| Dialister invisus_oral_taxon_118                    | 0     | 0     | 0    | 0     | 486   | 643  | 13   | 21   | 0     | 1     |
| Eikenella_unclassified                              | 8     | 11    | 0    | 0     | 13    | 12   | 503  | 780  | 186   | 299   |
| Eikenella corrodens_oral_taxon_577                  | 12    | 17    | 0    | 0     | 29    | 23   | 55   | 89   | 204   | 262   |
| Erysipelotrichaceae_unclassified                    |       |       |      |       |       |      |      |      |       |       |
| Escherichiacoli_oral_taxon_574                      | 2119  | 2877  | 3713 | 5250  | 174   | 147  | 66   | 54   | 397   | 616   |
| Eubacterium [XI][G-1]infirmum_oral_taxon_105        | 2     | 1     | 406  | 149   | 1345  | 884  | 388  | 673  | 338   | 584   |
| Eubacterium [XI][G-3]brachy_oral_taxon_557          | 0     | 0     | 0    | 0     | 249   | 302  | 284  | 189  | 71    | 121   |
| Eubacterium [XI][G-6]                               |       |       |      |       |       |      |      |      |       |       |
| Eubacterium [XI][G-6]minutum_oral_taxon_673         |       |       |      |       |       |      |      |      |       |       |
| Filifactor alocis_oral_taxon_539                    | 2     | 1     | 0    | 0     | 421   | 350  | 10   | 18   | 35    | 60    |
| Firmicutes_unclassified                             | 5     | 7     | 0    | 0     | 205   | 346  | 19   | 18   | 8     | 7     |
| Fretibacterium_unclassified                         | 2     | 3     | 0    | 0     | 2349  | 4050 | 2    | 1    | 32    | 52    |
| Fretibacterium fastidiosum_oral_taxon_363           | 2     | 1     | 113  | 159   | 1703  | 1831 | 2    | 2    | 353   | 599   |
| Fretibacterium sp.oral_taxon_361                    | 6     | 4     | 185  | 97    | 3343  | 3904 | 1    | 2    | 1942  | 3340  |
| Fusobacterium_unclassified                          | 1156  | 253   | 9450 | 13364 | 12896 | 9539 | 2948 | 4395 | 9524  | 13640 |
| Fusobacterium nucleatum ss_vincentii_oral_taxon_200 | 0     | 0     | 2204 | 2162  | 263   | 435  | 684  | 880  | 294   | 295   |
| Fusobacterium periodonticum_oral_taxon_201          | 0     | 0     | 900  | 1273  | 465   | 805  | 358  | 620  | 27    | 33    |
| Fusobacterium sp.oral_taxon_203                     | 0     | 0     | 1046 | 1160  | 4     | 4    | 8199 | 7100 | 15112 | 14246 |
| Gemella morbillorum_oral_taxon_046                  | 2459  | 2098  | 467  | 660   | 551   | 294  | 310  | 527  | 1595  | 1436  |
| Haemophilus_unclassified                            | 106   | 132   | 0    | 0     | 31    | 49   | 77   | 130  | 353   | 486   |
| Haemophilussp.oral_taxon_035                        | 15619 | 16500 | 1350 | 1909  | 242   | 313  | 35   | 49   | 5149  | 8406  |
| Helicobacterpylori_oral_taxon_812                   |       |       |      |       |       |      |      |      |       |       |
| Johnsonellaignava_oral_taxon_635                    | 1     | 1     | 267  | 377   | 540   | 436  | 133  | 193  | 430   | 492   |
| Johnsonellasp.oral_taxon_166                        |       |       |      |       |       |      |      |      |       |       |
| Kingella sp.oral_taxon_459                          | 1796  | 2266  | 0    | 0     | 161   | 255  | 50   | 86   | 3     | 3     |
| Lachnoanaerobaculum_unclassified                    |       |       |      |       |       |      |      |      |       |       |
| Lachnoanaerobaculumsp.oral_taxon_083                | 0     | 0     | 0    | 0     | 28    | 23   | 91   | 95   | 1318  | 2276  |
| Lachnoanaerobaculumsp.oral_taxon_496                | 0     | 0     | 0    | 0     | 57    | 45   | 30   | 53   | 137   | 228   |
| Lachnoanaerobaculum umeaense_oral_taxon_107         | 0     | 0     | 0    | 0     | 78    | 63   | 103  | 90   | 228   | 395   |
| Lachnospiraceae [G-2]_unclassified                  | 127   | 59    | 563  | 795   | 57    | 70   | 5    | 3    | 269   | 415   |
| Lachnospiraceae [G-2]sp.oral_taxon_088              | 62    | 85    | 0    | 0     | 155   | 40   | 223  | 131  | 797   | 756   |
| Lachnospiraceae [G-2]sp.oral_taxon_096              |       |       |      |       |       |      |      |      |       |       |
| Lachnospiraceae [G-3]sp.oral_taxon_100              | 4     | 3     | 338  | 477   | 139   | 109  | 1362 | 1756 | 1312  | 1176  |
| Lachnospiraceae [G-5]sp.oral_taxon_080              |       |       |      |       |       |      |      |      |       |       |
| Lachnospiraceae [G-6]sp.oral_taxon_090              |       |       |      |       |       |      |      |      |       |       |
| Lachnospiraceae [G-8]sp.oral_taxon_500              | 0     | 0     | 0    | 0     | 218   | 179  | 0    | 0    | 26    | 44    |
| Lachnospiraceae [XIVa]_unclassified                 |       |       |      |       |       |      |      |      |       |       |
| Lactobacillales_unclassified                        | 1685  | 1548  | 338  | 477   | 21    | 32   | 6    | 9    | 654   | 1013  |
| Lactobacillus                                       |       |       |      |       |       |      |      |      |       |       |
| Lactobacillus [XVII] catenaformis_oral_taxon_569    |       |       |      |       |       |      |      |      |       |       |
| Lactobacillus gasseri_oral_taxon_615                |       |       |      |       |       |      |      |      |       |       |
| Lactobacillus salivarius_oral_taxon_756             |       |       |      |       |       |      |      |      |       |       |
| Lactobacillus sp.oral_taxon_052                     |       |       |      |       |       |      |      |      |       |       |

|                                                      |       |       |      |      |      |      |      |       |       |       |
|------------------------------------------------------|-------|-------|------|------|------|------|------|-------|-------|-------|
| Lactobacillus vaginalis_oral_taxon_051               |       |       |      |      |      |      |      |       |       |       |
| Leptotrichia_unclassified                            | 277   | 293   | 934  | 97   | 2390 | 1775 | 5755 | 7449  | 21311 | 13690 |
| Leptotrichia goodfellowii_oral_taxon_845             | 394   | 557   | 0    | 0    | 0    | 0    | 1    | 1     | 0     | 1     |
| Leptotrichia hongkongensis_oral_taxon_213            |       |       |      |      |      |      |      |       |       |       |
| Leptotrichia sp._oral_taxon_212                      |       |       |      |      |      |      |      |       |       |       |
| Leptotrichia sp._oral_taxon_223                      | 0     | 0     | 113  | 159  | 382  | 335  | 0    | 0     | 7481  | 12957 |
| Leptotrichia sp._oral_taxon_225                      | 0     | 0     | 563  | 795  | 2    | 2    | 319  | 552   | 0     | 1     |
| Leptotrichia sp._oral_taxon_392                      | 2     | 3     | 0    | 0    | 58   | 21   | 0    | 0     | 2528  | 2428  |
| Leptotrichia sp._oral_taxon_498                      |       |       |      |      |      |      |      |       |       |       |
| Leptotrichia sp._oral_taxon_847                      |       |       |      |      |      |      |      |       |       |       |
| Leptotrichiaceae_unclassified                        |       |       |      |      |      |      |      |       |       |       |
| Megasphaera                                          | 56    | 78    | 113  | 159  | 0    | 1    | 347  | 586   | 0     | 0     |
| Megasphaera<br>micronuciformis_oral_taxon_122        |       |       |      |      |      |      |      |       |       |       |
| Mitsuokella sp._oral_taxon_131                       |       |       |      |      |      |      |      |       |       |       |
| Mitsuokella sp._oral_taxon_521                       |       |       |      |      |      |      |      |       |       |       |
| Mogibacterium timidum_oral_taxon_042                 |       |       |      |      |      |      |      |       |       |       |
| Mogibacterium vescum_oral_taxon_008                  |       |       |      |      |      |      |      |       |       |       |
| Mollicutes_[G-1] sp._oral_taxon_504                  |       |       |      |      |      |      |      |       |       |       |
| Mollicutes_[G-2] sp._oral_taxon_906                  |       |       |      |      |      |      |      |       |       |       |
| Moraxella catarrhalis_oral_taxon_833                 | 14030 | 13357 | 156  | 220  | 249  | 208  | 2    | 3     | 937   | 1188  |
| Moryella sp._oral_taxon_097                          | 0     | 0     | 0    | 0    | 173  | 242  | 0    | 0     | 0     | 0     |
| Moryella sp._oral_taxon_373                          |       |       |      |      |      |      |      |       |       |       |
| Mycoplasma                                           | 0     | 0     | 0    | 0    | 1    | 1    | 536  | 929   | 1     | 1     |
| Neisseria_unclassified                               | 2517  | 2512  | 0    | 0    | 35   | 44   | 14   | 23    | 233   | 212   |
| Neisseriaceae_unclassified                           | 989   | 1033  | 1238 | 1750 | 91   | 44   | 4    | 3     | 524   | 641   |
| Neisseria oralis_oral_taxon_014                      | 51    | 54    | 338  | 477  | 0    | 0    | 1    | 2     | 15708 | 26154 |
| Olsenella sp._oral_taxon_807                         |       |       |      |      |      |      |      |       |       |       |
| Oribacterium                                         |       |       |      |      |      |      |      |       |       |       |
| Oribacterium sp._oral_taxon_078                      |       |       |      |      |      |      |      |       |       |       |
| Oribacterium sp._oral_taxon_102                      |       |       |      |      |      |      |      |       |       |       |
| Parvimonas_unclassified                              | 1     | 1     | 2290 | 2920 | 1433 | 640  | 1134 | 298   | 264   | 414   |
| Parvimonas micra_oral_taxon_111                      |       |       |      |      |      |      |      |       |       |       |
| Pasteurellaceae_unclassified                         | 5913  | 6047  | 50   | 70   | 567  | 417  | 558  | 427   | 3504  | 3238  |
| Peptococcus sp._oral_taxon_167                       | 1     | 1     | 371  | 372  | 928  | 1071 | 188  | 237   | 160   | 183   |
| Peptostreptococcaceae_[XI][G-1] sp._oral_taxon_383   |       |       |      |      |      |      |      |       |       |       |
| Peptostreptococcaceae_[XI][G-2] sp._oral_taxon_091   |       |       |      |      |      |      |      |       |       |       |
| Peptostreptococcaceae_[XI][G-4]                      | 0     | 0     | 0    | 0    | 173  | 171  | 0    | 0     | 7     | 12    |
| Peptostreptococcaceae_[XI][G-5] sp._oral_taxon_493   |       |       |      |      |      |      |      |       |       |       |
| Peptostreptococcaceae_[XI][G-7] sp._oral_taxon_081   |       |       |      |      |      |      |      |       |       |       |
| Peptostreptococcaceae_[XI]_unclassified              | 1     | 1     | 21   | 29   | 380  | 411  | 256  | 331   | 223   | 263   |
| Peptostreptococcaceae_[XIII][G-1] sp._oral_taxon_113 |       |       |      |      |      |      |      |       |       |       |
| Peptostreptococcaceae_[XIII][G-2] sp._oral_taxon_790 | 0     | 0     | 563  | 795  | 241  | 403  | 0    | 0     | 0     | 0     |
| Peptostreptococcaceae_[XIII]_unclassified            |       |       |      |      |      |      |      |       |       |       |
| Peptostreptococcus stomatis_oral_taxon_112           | 1     | 1     | 144  | 111  | 641  | 270  | 0    | 1     | 155   | 260   |
| Porphyromonadaceae_unclassified                      |       |       |      |      |      |      |      |       |       |       |
| Porphyromonas_unclassified                           | 1199  | 1440  | 225  | 318  | 12   | 9    | 11   | 19    | 101   | 123   |
| Porphyromonas catoniae_oral_taxon_283                |       |       |      |      |      |      |      |       |       |       |
| Porphyromonas endodontalis_oral_taxon_273            | 1     | 1     | 225  | 318  | 951  | 1193 | 91   | 157   | 2     | 1     |
| Porphyromonas gingivalis_oral_taxon_619              | 3     | 2     | 612  | 865  | 6281 | 5655 | 1256 | 2170  | 1351  | 2328  |
| Porphyromonas sp._oral_taxon_279                     | 3067  | 3792  | 3375 | 4773 | 785  | 517  | 1331 | 1262  | 4795  | 5244  |
| Prevotella_unclassified                              | 258   | 247   | 5443 | 7697 | 4438 | 4545 | 463  | 462   | 5269  | 7026  |
| Prevotella baroniae_oral_taxon_553                   |       |       |      |      |      |      |      |       |       |       |
| Prevotella buccae_oral_taxon_560                     | 1     | 1     | 113  | 159  | 234  | 165  | 1    | 2     | 1397  | 2392  |
| Prevotellaceae_unclassified                          | 3     | 1     | 1350 | 1909 | 1377 | 1102 | 355  | 613   | 2077  | 2117  |
| Prevotella dentalis_oral_taxon_583                   | 2     | 2     | 3150 | 4455 | 7317 | 6112 | 7955 | 10480 | 14    | 20    |
| Prevotella denticola_oral_taxon_291                  |       |       |      |      |      |      |      |       |       |       |

|                                                   |      |      |      |      |      |      |      |       |      |      |
|---------------------------------------------------|------|------|------|------|------|------|------|-------|------|------|
| Prevotella enoeca_oral_taxon_600                  |      |      |      |      |      |      |      |       |      |      |
| Prevotella fusca_oral_taxon_782                   |      |      |      |      |      |      |      |       |      |      |
| Prevotella intermedia_oral_taxon_643              |      |      |      |      |      |      |      |       |      |      |
| Prevotella maculosa_oral_taxon_289                |      |      |      |      |      |      |      |       |      |      |
| Prevotella marshii_oral_taxon_665                 | 0    | 0    | 113  | 159  | 349  | 604  | 0    | 0     | 0    | 1    |
| Prevotella melaninogenica_oral_taxon_469          | 0    | 0    | 0    | 0    | 77   | 72   | 0    | 1     | 279  | 483  |
| Prevotella micans_oral_taxon_378                  |      |      |      |      |      |      |      |       |      |      |
| Prevotella nigrescens_oral_taxon_693              |      |      |      |      |      |      |      |       |      |      |
| Prevotella oralis_oral_taxon_705                  |      |      |      |      |      |      |      |       |      |      |
| Prevotella oris_oral_taxon_311                    |      |      |      |      |      |      |      |       |      |      |
| Prevotella oulorum_oral_taxon_288                 |      |      |      |      |      |      |      |       |      |      |
| Prevotella saccharolytica_oral_taxon_781          | 0    | 0    | 0    | 0    | 57   | 89   | 61   | 106   | 148  | 227  |
| Prevotella sp._oral_taxon_299                     |      |      |      |      |      |      |      |       |      |      |
| Prevotella sp._oral_taxon_300                     |      |      |      |      |      |      |      |       |      |      |
| Prevotella sp._oral_taxon_304                     | 1    | 1    | 113  | 159  | 713  | 1234 | 0    | 1     | 36   | 58   |
| Prevotella sp._oral_taxon_313                     | 4    | 2    | 0    | 0    | 7852 | 7248 | 1    | 1     | 4    | 2    |
| Prevotella sp._oral_taxon_315                     |      |      |      |      |      |      |      |       |      |      |
| Prevotella sp._oral_taxon_317                     | 1    | 0    | 3173 | 351  | 622  | 736  | 1964 | 1706  | 1582 | 1999 |
| Prevotella sp._oral_taxon_376                     | 0    | 0    | 450  | 636  | 181  | 309  | 1    | 2     | 324  | 554  |
| Prevotella sp._oral_taxon_443                     |      |      |      |      |      |      |      |       |      |      |
| Prevotella sp._oral_taxon_472                     |      |      |      |      |      |      |      |       |      |      |
| Prevotella sp._oral_taxon_515                     |      |      |      |      |      |      |      |       |      |      |
| Prevotella sp._oral_taxon_526                     | 3    | 0    | 1350 | 1909 | 372  | 638  | 3    | 4     | 210  | 360  |
| Prevotella sp._oral_taxon_820                     | 1    | 1    | 653  | 302  | 2177 | 994  | 1    | 1     | 277  | 477  |
| Prevotellaceae_unclassified                       |      |      |      |      |      |      |      |       |      |      |
| Proteobacteria_unclassified                       |      |      |      |      |      |      |      |       |      |      |
| Pyramidobacter piscolens_oral_taxon_357           |      |      |      |      |      |      |      |       |      |      |
| Rothia_unclassified                               | 869  | 1104 | 0    | 0    | 0    | 1    | 5    | 6     | 45   | 49   |
| Scardovia wiggisiae_oral_taxon_195                |      |      |      |      |      |      |      |       |      |      |
| Selenomonas_unclassified                          | 32   | 20   | 311  | 440  | 888  | 670  | 4133 | 3070  | 4196 | 3678 |
| Selenomonas dianaе_oral_taxon_139                 |      |      |      |      |      |      |      |       |      |      |
| Selenomonas sp._oral_taxon_501                    | 1    | 1    | 113  | 159  | 84   | 100  | 201  | 176   | 0    | 1    |
| Selenomonas sputigena_oral_taxon_151              | 4    | 1    | 1060 | 1499 | 1438 | 784  | 3    | 2     | 10   | 6    |
| Shuttleworthia satelles_oral_taxon_095            |      |      |      |      |      |      |      |       |      |      |
| Solobacterium moorei_oral_taxon_678               | 0    | 0    | 0    | 0    | 102  | 53   | 160  | 144   | 38   | 66   |
| SR1_[G-1]                                         | 6    | 8    | 0    | 0    | 114  | 187  | 0    | 0     | 59   | 86   |
| SR1_[G-1]sp._oral_taxon_345                       | 0    | 0    | 563  | 795  | 19   | 32   | 0    | 1     | 757  | 686  |
| SR1_[G-1]sp._oral_taxon_874                       | 0    | 0    | 0    | 0    | 5    | 4    | 0    | 1     | 163  | 150  |
| SR1_[G-1]sp._oral_taxon_875                       |      |      |      |      |      |      |      |       |      |      |
| Streptococcus_unclassified                        | 4471 | 3871 | 1496 | 524  | 458  | 180  | 5317 | 6024  | 3507 | 5413 |
| Streptococcus anginosus_oral_taxon_543            |      |      |      |      |      |      |      |       |      |      |
| Streptococcus downei_oral_taxon_594               | 39   | 54   | 3795 | 1230 | 189  | 328  | 1829 | 3158  | 1    | 2    |
| Streptococcus mutans_oral_taxon_686               |      |      |      |      |      |      |      |       |      |      |
| Streptococcus parasanguinis_II_oral_taxon_411     | 413  | 69   | 1297 | 75   | 4823 | 2342 | 9446 | 11063 | 2555 | 2010 |
| Streptococcus sp._oral_taxon_058                  | 2270 | 2932 | 622  | 880  | 880  | 549  | 445  | 721   | 1786 | 1083 |
| Syntrophomonadaceae_[VIII][G-1]sp._oral_taxon_435 |      |      |      |      |      |      |      |       |      |      |
| Tannerella                                        | 1    | 1    | 0    | 0    | 16   | 17   | 1    | 2     | 367  | 636  |
| Tannerella forsythia_oral_taxon_613               | 1    | 1    | 381  | 98   | 1228 | 1539 | 1167 | 1616  | 66   | 112  |
| Tannerella sp._oral_taxon_286                     | 1    | 1    | 563  | 795  | 118  | 179  | 412  | 607   | 604  | 600  |
| Tannerella sp._oral_taxon_916                     |      |      |      |      |      |      |      |       |      |      |
| TM7_[G-3]sp._oral_taxon_351                       |      |      |      |      |      |      |      |       |      |      |
| Treponema_unclassified                            | 3    | 4    | 0    | 0    | 1018 | 503  | 172  | 294   | 1270 | 2195 |
| Treponema amylovorum_oral_taxon_541               |      |      |      |      |      |      |      |       |      |      |
| Treponema denticola_oral_taxon_584                | 4    | 1    | 225  | 318  | 3444 | 1941 | 2    | 1     | 383  | 658  |
| Treponema lecithinolyticum_oral_taxon_653         | 1    | 1    | 82   | 28   | 1410 | 1363 | 0    | 1     | 676  | 1171 |
| Treponema maltophilum_oral_taxon_664              | 0    | 0    | 0    | 0    | 555  | 345  | 0    | 0     | 190  | 329  |
| Treponema parvum_oral_taxon_724                   |      |      |      |      |      |      |      |       |      |      |
| Treponema pectinovorum_oral_taxon_725             |      |      |      |      |      |      |      |       |      |      |
| Treponema socranskii_oral_taxon_769               |      |      |      |      |      |      |      |       |      |      |
| Treponema sp._oral_taxon_237                      |      |      |      |      |      |      |      |       |      |      |
| Treponema sp._oral_taxon_239                      |      |      |      |      |      |      |      |       |      |      |

|                                         |     |     |       |       |       |      |       |       |       |       |
|-----------------------------------------|-----|-----|-------|-------|-------|------|-------|-------|-------|-------|
| Treponema sp._oral_taxon_242            |     |     |       |       |       |      |       |       |       |       |
| Treponema sp._oral_taxon_246            |     |     |       |       |       |      |       |       |       |       |
| Treponema sp._oral_taxon_249            |     |     |       |       |       |      |       |       |       |       |
| Treponema sp._oral_taxon_250            |     |     |       |       |       |      |       |       |       |       |
| Treponema sp._oral_taxon_252            |     |     |       |       |       |      |       |       |       |       |
| Treponema sp._oral_taxon_254            |     |     |       |       |       |      |       |       |       |       |
| Treponema sp._oral_taxon_255            |     |     |       |       |       |      |       |       |       |       |
| Treponema sp._oral_taxon_257            |     |     |       |       |       |      |       |       |       |       |
| Treponema sp._oral_taxon_258            |     |     |       |       |       |      |       |       |       |       |
| Treponema sp._oral_taxon_263            |     |     |       |       |       |      |       |       |       |       |
| Treponema sp._oral_taxon_270            |     |     |       |       |       |      |       |       |       |       |
| Treponema sp._oral_taxon_271            |     |     |       |       |       |      |       |       |       |       |
| Treponema sp._oral_taxon_508            |     |     |       |       |       |      |       |       |       |       |
| Veillonella_unclassified                | 848 | 71  | 15504 | 12380 | 21622 | 3752 | 31988 | 42626 | 19836 | 16594 |
| Veillonellaceae_[G-1]_unclassified      | 1   | 1   | 0     | 0     | 579   | 1002 | 1     | 2     | 1076  | 1842  |
| Veillonellaceae_[G-1]sp._oral_taxon_129 |     |     |       |       |       |      |       |       |       |       |
| Veillonellaceae_[G-1]sp._oral_taxon_145 |     |     |       |       |       |      |       |       |       |       |
| Veillonellaceae_[G-1]sp._oral_taxon_155 |     |     |       |       |       |      |       |       |       |       |
| Veillonellaceae_unclassified            | 49  | 69  | 0     | 0     | 8     | 9    | 77    | 110   | 319   | 462   |
| Veillonella dispar_oral_taxon_160       | 364 | 462 | 7153  | 10116 | 323   | 557  | 3707  | 6308  | 7     | 11    |
| Veillonella parvula_oral_taxon_161      | 69  | 80  | 799   | 33    | 865   | 694  | 4432  | 7450  | 125   | 105   |
| Veillonella sp._oral_taxon_780          | 125 | 177 | 0     | 0     | 21    | 36   | 4     | 7     | 91    | 137   |

19  
20  
21  
22

**Supplemental Table 4.** OTU distribution in samples from Adult group.

| OTU ID                                               | Baseline |      | 0.5  |      | 1    |      | 3    |      | 5    |      |
|------------------------------------------------------|----------|------|------|------|------|------|------|------|------|------|
|                                                      | Mean     | SD   | Mean | SD   | Mean | SD   | Mean | SD   | Mean | SD   |
| Abiotrophia defectiva_oral_taxon_389                 | 88       | 80   | 495  | 421  | 45   | 75   | 142  | 177  | 93   | 119  |
| Actinobaculum sp._oral_taxon_183                     | 232      | 174  | 231  | 190  | 80   | 70   | 276  | 161  | 178  | 118  |
| Actinomyces_unclassified                             | 214      | 215  | 196  | 169  | 10   | 17   | 345  | 427  | 347  | 263  |
| Actinomyces sp._oral_taxon_171                       |          |      |      |      |      |      |      |      |      |      |
| Actinomyces sp._oral_taxon_179                       |          |      |      |      |      |      |      |      |      |      |
| Actinomyces sp._oral_taxon_180                       |          |      |      |      |      |      |      |      |      |      |
| Actinomyces sp._oral_taxon_449                       | 16       | 28   | 2    | 3    | 4    | 7    | 93   | 226  | 6    | 6    |
| Aggregatibacter_unclassified                         | 77       | 128  | 62   | 77   | 100  | 169  | 1113 | 1722 | 40   | 10   |
| Aggregatibacter actinomycetemcomitans_oral_taxon_531 | 1492     | 1939 | 537  | 354  | 3124 | 2316 | 434  | 267  | 1407 | 708  |
| Aggregatibacter sp._oral_taxon_458                   | 44       | 61   | 91   | 158  | 0    | 0    | 15   | 31   | 0    | 0    |
| Aggregatibacter sp._oral_taxon_513                   | 211      | 366  | 251  | 248  | 41   | 70   | 27   | 51   | 58   | 33   |
| Alloprevotella_unclassified                          | 8        | 10   | 15   | 12   | 47   | 81   | 52   | 68   | 110  | 51   |
| Alloprevotella rava_oral_taxon_302                   | 68       | 85   | 116  | 197  | 307  | 423  | 27   | 21   | 382  | 512  |
| Alloprevotella sp._oral_taxon_308                    | 49       | 66   | 13   | 21   | 3    | 6    | 61   | 43   | 42   | 65   |
| Alloprevotella sp._oral_taxon_473                    | 411      | 381  | 874  | 984  | 587  | 507  | 1903 | 1140 | 118  | 58   |
| Alloprevotella sp._oral_taxon_912                    | 104      | 78   | 80   | 107  | 47   | 51   | 186  | 226  | 41   | 9    |
| Alloprevotella tanneriae_oral_taxon_466              | 600      | 668  | 2413 | 4162 | 998  | 1702 | 693  | 504  | 421  | 636  |
| Atopobium_unclassified                               | 162      | 324  | 28   | 43   | 67   | 115  | 359  | 706  | 136  | 198  |
| Atopobium parvulum_oral_taxon_723                    | 9        | 9    | 35   | 59   | 7    | 9    | 88   | 101  | 9    | 13   |
| Atopobium sp._oral_taxon_199                         | 41       | 44   | 18   | 22   | 12   | 20   | 40   | 25   | 15   | 23   |
| Atopobium sp._oral_taxon_810                         | 7        | 9    | 4    | 6    | 12   | 21   | 38   | 71   | 188  | 289  |
| Bacteria_unclassified                                | 2286     | 1667 | 1592 | 1828 | 1547 | 1320 | 5777 | 3233 | 4140 | 4329 |
| Bacteroidaceae [G-1] sp._oral_taxon_272              | 218      | 164  | 89   | 96   | 97   | 89   | 430  | 516  | 711  | 889  |
| Bacteroidales [G-2]sp._oral_taxon_274                | 753      | 99   | 483  | 642  | 404  | 530  | 891  | 1286 | 696  | 684  |
| Bacteroidales_unclassified                           | 226      | 276  | 361  | 481  | 322  | 296  | 266  | 311  | 356  | 358  |
| Bacteroides_unclassified                             | 383      | 153  | 357  | 520  | 14   | 8    | 411  | 583  | 128  | 78   |
| Bacteroides heparinolyticus_oral_taxon_630           | 106      | 80   | 258  | 298  | 305  | 228  | 615  | 517  | 274  | 239  |
| Bacteroides tectus_oral_taxon_787                    | 51       | 114  | 2    | 3    | 19   | 33   | 104  | 252  | 0    | 0    |
| Bacteroides zoogloiformans_oral_taxon_465            | 0        | 0    | 0    | 0    | 119  | 207  | 230  | 559  | 1    | 1    |
| Bacteroidetes [G-3]                                  | 78       | 106  | 13   | 18   | 137  | 219  | 567  | 627  | 524  | 366  |
| Bacteroidetes [G-3]sp._oral_taxon_280                | 37       | 46   | 357  | 566  | 79   | 82   | 112  | 102  | 75   | 46   |
| Bacteroidetes [G-3]sp._oral_taxon_365                | 176      | 235  | 0    | 1    | 2413 | 2328 | 926  | 1799 | 488  | 225  |
| Bacteroidetes [G-3]sp._oral_taxon_436                | 65       | 59   | 35   | 55   | 45   | 37   | 83   | 65   | 191  | 313  |
| Bacteroidetes [G-3]sp._oral_taxon_503                | 37       | 62   | 193  | 316  | 12   | 21   | 64   | 48   | 62   | 65   |
| Bacteroidetes [G-4]sp._oral_taxon_509                |          |      |      |      |      |      |      |      |      |      |
| Bacteroidetes [G-5]sp._oral_taxon_505                | 88       | 120  | 360  | 548  | 105  | 182  | 177  | 105  | 158  | 141  |
| Bacteroidetes [G-5]sp._oral_taxon_507                | 74       | 136  | 3    | 5    | 8    | 13   | 68   | 110  | 60   | 74   |
| Bacteroidetes [G-5]sp._oral_taxon_511                | 113      | 65   | 325  | 392  | 106  | 135  | 60   | 83   | 86   | 56   |
| Bacteroidetes_unclassified                           | 824      | 1663 | 105  | 163  | 1523 | 2595 | 2297 | 3077 | 4767 | 5308 |
| Bergeyella_unclassified                              | 16       | 23   | 146  | 127  | 20   | 29   | 142  | 263  | 26   | 40   |
| Bergeyellasp._oral_taxon_907                         | 140      | 197  | 12   | 19   | 0    | 0    | 9    | 12   | 46   | 36   |
| Burkholderiaceae_unclassified                        | 59       | 70   | 37   | 34   | 0    | 0    | 14   | 33   | 8    | 14   |
| Burkholderiales_unclassified                         | 64       | 94   | 100  | 141  | 63   | 90   | 32   | 63   | 54   | 73   |
| Butyrivibriosp._oral_taxon_094                       | 31       | 42   | 31   | 41   | 8    | 8    | 94   | 43   | 71   | 70   |
| Campylobacter_unclassified                           | 432      | 254  | 230  | 86   | 108  | 58   | 219  | 442  | 428  | 36   |
| Campylobacter concisus_oral_taxon_575                |          |      |      |      |      |      |      |      |      |      |
| Campylobacter rectus_oral_taxon_748                  | 759      | 650  | 689  | 270  | 719  | 358  | 375  | 310  | 452  | 102  |
| Campylobacter sp._oral_taxon_044                     | 51       | 70   | 912  | 839  | 326  | 565  | 5    | 6    | 67   | 116  |
| Capnocytophaga_unclassified                          | 2076     | 2156 | 1134 | 1356 | 139  | 113  | 1369 | 2179 | 1111 | 947  |
| Capnocytophaga granulosa_oral_taxon_325              | 131      | 183  | 227  | 370  | 15   | 21   | 340  | 297  | 299  | 355  |
| Capnocytophagasp._oral_taxon_326                     |          |      |      |      |      |      |      |      |      |      |
| Cardiobacterium_unclassified                         | 99       | 191  | 122  | 175  | 34   | 58   | 28   | 36   | 24   | 14   |
| Cardiobacterium hominis_oral_taxon_633               | 86       | 142  | 20   | 23   | 0    | 0    | 9    | 15   | 6    | 4    |
| Cardiobacterium valvulum_oral_taxon_540              | 117      | 142  | 19   | 21   | 0    | 0    | 32   | 59   | 25   | 9    |
| Catonella morbi_oral_taxon_165                       | 775      | 606  | 1310 | 580  | 468  | 392  | 1227 | 684  | 443  | 52   |
| Catonella sp._oral_taxon_451                         |          |      |      |      |      |      |      |      |      |      |
| Chloroflexi [G-1]sp._oral_taxon_439                  | 584      | 411  | 83   | 60   | 1106 | 1478 | 1833 | 1500 | 2027 | 1606 |
| Clostridiales [F-1][G-1]sp._oral_taxon_093           | 61       | 51   | 51   | 36   | 114  | 138  | 296  | 598  | 154  | 160  |

|                                                     |      |      |       |       |       |       |      |      |      |      |
|-----------------------------------------------------|------|------|-------|-------|-------|-------|------|------|------|------|
| Clostridiales [F-1][G-2]sp.oral_taxon_402           | 62   | 70   | 30    | 28    | 844   | 731   | 471  | 549  | 771  | 1041 |
| Clostridiales [F-2][G-1]sp.oral_taxon_075           | 576  | 714  | 319   | 553   | 123   | 165   | 265  | 195  | 243  | 97   |
| Clostridiales [F-2][G-2]sp.oral_taxon_085           | 176  | 151  | 270   | 466   | 12    | 19    | 131  | 119  | 142  | 89   |
| Clostridiales [F-2][G-3]sp.oral_taxon_381           | 35   | 79   | 2     | 2     | 3     | 4     | 294  | 458  | 25   | 40   |
| Clostridiales [F-2]_unclassified                    |      |      |       |       |       |       |      |      |      |      |
| Clostridiales_unclassified                          | 229  | 248  | 365   | 250   | 904   | 802   | 737  | 736  | 549  | 388  |
| Comomonadaceae_unclassified                         |      |      |       |       |       |       |      |      |      |      |
| Coriobacteriaceae_unclassified                      |      |      |       |       |       |       |      |      |      |      |
| Corynebacterium durum_oral_taxon_595                | 46   | 51   | 64    | 104   | 0     | 0     | 2    | 2    | 25   | 18   |
| Corynebacterium matruchotii_oral_taxon_666          | 765  | 739  | 723   | 839   | 8     | 13    | 673  | 1554 | 647  | 626  |
| Desulfobulbus sp.oral_taxon_041                     | 556  | 281  | 221   | 128   | 352   | 232   | 567  | 727  | 704  | 97   |
| Desulfomicrobium orale_oral_taxon_703               | 231  | 262  | 0     | 0     | 597   | 807   | 524  | 362  | 228  | 336  |
| Desulfovibrio fairfieldensis_oral_taxon_605         | 8    | 13   | 5     | 6     | 7     | 6     | 96   | 106  | 115  | 199  |
| Desulfovibrio sp.oral_taxon_040                     |      |      |       |       |       |       |      |      |      |      |
| Dialister invisus_oral_taxon_118                    | 291  | 222  | 287   | 452   | 714   | 801   | 349  | 263  | 589  | 457  |
| Eikenella_unclassified                              |      |      |       |       |       |       |      |      |      |      |
| Eikenella corrodens_oral_taxon_577                  | 144  | 155  | 369   | 334   | 106   | 178   | 55   | 39   | 65   | 61   |
| Erysipelotrichaceae_unclassified                    |      |      |       |       |       |       |      |      |      |      |
| Escherichiacoli_oral_taxon_574                      | 52   | 27   | 207   | 191   | 136   | 151   | 53   | 9    | 71   | 67   |
| Eubacterium [X][G-1]infirmum_oral_taxon_105         | 332  | 208  | 454   | 613   | 605   | 987   | 874  | 402  | 635  | 405  |
| Eubacterium [X][G-3]brachy_oral_taxon_557           | 172  | 127  | 671   | 696   | 296   | 159   | 182  | 180  | 74   | 55   |
| Eubacterium [X][G-6]                                |      |      |       |       |       |       |      |      |      |      |
| Eubacterium [X][G-6]minutum_oral_taxon_673          |      |      |       |       |       |       |      |      |      |      |
| Filifactor alocis_oral_taxon_539                    | 220  | 167  | 790   | 1266  | 1108  | 976   | 893  | 667  | 701  | 218  |
| Firmicutes_unclassified                             | 78   | 95   | 20    | 29    | 92    | 44    | 284  | 298  | 422  | 533  |
| Fretibacterium_unclassified                         | 1183 | 1356 | 561   | 733   | 156   | 138   | 1723 | 4011 | 158  | 188  |
| Fretibacterium fastidiosum_oral_taxon_363           | 2260 | 2776 | 1017  | 295   | 1733  | 971   | 1380 | 878  | 2879 | 1752 |
| Fretibacterium sp.oral_taxon_361                    | 5282 | 6155 | 2490  | 1917  | 6220  | 2587  | 4478 | 2528 | 9491 | 3718 |
| Fusobacterium_unclassified                          | 7077 | 3979 | 25171 | 21957 | 16417 | 14360 | 8198 | 3793 | 8125 | 3183 |
| Fusobacterium nucleatum ss_vincentii_oral_taxon_200 | 26   | 45   | 3598  | 5734  | 2259  | 3876  | 21   | 15   | 10   | 12   |
| Fusobacterium periodonticum_oral_taxon_201          |      |      |       |       |       |       |      |      |      |      |
| Fusobacterium sp.oral_taxon_203                     | 2935 | 6138 | 19    | 24    | 4     | 4     | 2409 | 5011 | 79   | 116  |
| Gemella morbillorum_oral_taxon_046                  | 603  | 678  | 3388  | 4689  | 2245  | 3639  | 1565 | 772  | 515  | 424  |
| Haemophilus_unclassified                            | 49   | 66   | 77    | 69    | 72    | 74    | 320  | 583  | 1    | 2    |
| Haemophilussp.oral_taxon_035                        | 96   | 92   | 1922  | 3273  | 1186  | 2038  | 179  | 150  | 50   | 61   |
| Helicobacterpylori_oral_taxon_812                   | 23   | 41   | 10    | 13    | 15    | 27    | 48   | 52   | 30   | 42   |
| Johnsonellaignava_oral_taxon_635                    | 317  | 345  | 181   | 201   | 86    | 149   | 143  | 273  | 67   | 18   |
| Johnsonellasp.oral_taxon_166                        |      |      |       |       |       |       |      |      |      |      |
| Kingella sp.oral_taxon_459                          | 0    | 1    | 307   | 532   | 191   | 324   | 1    | 2    | 0    | 0    |
| Lachnoanaerobaculum_unclassified                    |      |      |       |       |       |       |      |      |      |      |
| Lachnoanaerobaculumsp.oral_taxon_083                | 393  | 412  | 512   | 887   | 22    | 19    | 231  | 257  | 209  | 194  |
| Lachnoanaerobaculumsp.oral_taxon_496                | 81   | 86   | 70    | 69    | 9     | 11    | 58   | 89   | 31   | 23   |
| Lachnoanaerobaculum umeaense_oral_taxon_107         | 14   | 15   | 36    | 63    | 63    | 104   | 25   | 16   | 121  | 61   |
| Lachnospiraceae [G-2]_unclassified                  | 20   | 24   | 1940  | 3350  | 1036  | 1778  | 80   | 95   | 24   | 28   |
| Lachnospiraceae [G-2]sp.oral_taxon_088              | 196  | 258  | 184   | 290   | 51    | 74    | 149  | 99   | 76   | 28   |
| Lachnospiraceae [G-2]sp.oral_taxon_096              |      |      |       |       |       |       |      |      |      |      |
| Lachnospiraceae [G-3]sp.oral_taxon_100              | 597  | 635  | 824   | 1207  | 107   | 132   | 748  | 624  | 708  | 734  |
| Lachnospiraceae [G-5]sp.oral_taxon_080              |      |      |       |       |       |       |      |      |      |      |
| Lachnospiraceae [G-6]sp.oral_taxon_090              | 13   | 14   | 5     | 6     | 20    | 35    | 22   | 29   | 345  | 584  |
| Lachnospiraceae [G-8]sp.oral_taxon_500              | 166  | 95   | 143   | 86    | 172   | 149   | 217  | 79   | 198  | 170  |
| Lachnospiraceae [XIVa]_unclassified                 | 55   | 50   | 33    | 29    | 137   | 183   | 130  | 46   | 190  | 161  |
| Lactobacillales_unclassified                        | 19   | 23   | 389   | 657   | 316   | 544   | 79   | 94   | 15   | 19   |
| Lactobacillus                                       |      |      |       |       |       |       |      |      |      |      |
| Lactobacillus [XVII] catenaformis_oral_taxon_569    |      |      |       |       |       |       |      |      |      |      |
| Lactobacillus gasseri_oral_taxon_615                |      |      |       |       |       |       |      |      |      |      |
| Lactobacillus salivarius_oral_taxon_756             |      |      |       |       |       |       |      |      |      |      |
| Lactobacillus sp.oral_taxon_052                     |      |      |       |       |       |       |      |      |      |      |

|                                                     |      |      |      |       |      |      |      |      |      |      |
|-----------------------------------------------------|------|------|------|-------|------|------|------|------|------|------|
| Lactobacillus vaginalis_oral_taxon_051              |      |      |      |       |      |      |      |      |      |      |
| Leptotrichia_unclassified                           | 3075 | 3039 | 2695 | 3106  | 236  | 268  | 4527 | 3668 | 1891 | 1006 |
| Leptotrichia goodfellowii_oral_taxon_845            | 1061 | 917  | 111  | 88    | 512  | 306  | 5    | 6    | 241  | 350  |
| Leptotrichia hongkongensis_oral_taxon_213           | 912  | 1015 | 1191 | 1118  | 176  | 171  | 507  | 1032 | 306  | 392  |
| Leptotrichia sp._oral_taxon_212                     | 348  | 417  | 120  | 173   | 99   | 160  | 7    | 8    | 23   | 19   |
| Leptotrichia sp._oral_taxon_223                     | 1635 | 2313 | 609  | 1034  | 52   | 50   | 1821 | 1528 | 253  | 215  |
| Leptotrichia sp._oral_taxon_225                     | 493  | 640  | 273  | 405   | 36   | 62   | 408  | 742  | 401  | 24   |
| Leptotrichia sp._oral_taxon_392                     | 1076 | 1247 | 742  | 1226  | 296  | 491  | 565  | 809  | 347  | 352  |
| Leptotrichia sp._oral_taxon_498                     |      |      |      |       |      |      |      |      |      |      |
| Leptotrichia sp._oral_taxon_847                     |      |      |      |       |      |      |      |      |      |      |
| Leptotrichiaceae_unclassified                       | 7    | 12   | 561  | 957   | 328  | 567  | 8    | 8    | 2    | 3    |
| Megasphaera                                         |      |      |      |       |      |      |      |      |      |      |
| Megasphaera<br>micronuciformis_oral_taxon_122       |      |      |      |       |      |      |      |      |      |      |
| Mitsuokella sp._oral_taxon_131                      |      |      |      |       |      |      |      |      |      |      |
| Mitsuokella sp._oral_taxon_521                      |      |      |      |       |      |      |      |      |      |      |
| Mogibacterium timidum_oral_taxon_042                | 21   | 19   | 33   | 40    | 15   | 13   | 41   | 37   | 21   | 23   |
| Mogibacterium vescum_oral_taxon_008                 | 23   | 20   | 18   | 29    | 37   | 51   | 72   | 32   | 53   | 34   |
| Mollicutes_[G-1] sp._oral_taxon_504                 | 30   | 55   | 1    | 1     | 37   | 64   | 33   | 35   | 90   | 84   |
| Mollicutes_[G-2] sp._oral_taxon_906                 | 30   | 32   | 98   | 144   | 120  | 155  | 166  | 108  | 165  | 143  |
| Moraxella catarrhalis_oral_taxon_833                | 200  | 361  | 214  | 348   | 139  | 221  | 62   | 83   | 81   | 127  |
| Moryella sp._oral_taxon_097                         | 79   | 89   | 47   | 74    | 9    | 8    | 468  | 350  | 48   | 48   |
| Moryella sp._oral_taxon_373                         | 34   | 24   | 31   | 50    | 77   | 67   | 88   | 30   | 135  | 177  |
| Mycoplasma                                          |      |      |      |       |      |      |      |      |      |      |
| Neisseria_unclassified                              | 263  | 369  | 28   | 22    | 4    | 6    | 3    | 4    | 137  | 222  |
| Neisseriaceae_unclassified                          | 21   | 8    | 1338 | 2286  | 895  | 1481 | 67   | 101  | 21   | 33   |
| Neisseria oralis_oral_taxon_014                     | 2    | 3    | 170  | 293   | 0    | 0    | 6    | 14   | 140  | 242  |
| Olsenella sp._oral_taxon_807                        | 126  | 130  | 13   | 21    | 1    | 2    | 28   | 56   | 49   | 56   |
| Oribacterium                                        | 67   | 116  | 363  | 599   | 27   | 32   | 23   | 24   | 154  | 252  |
| Oribacterium sp._oral_taxon_078                     | 126  | 230  | 116  | 199   | 0    | 1    | 51   | 66   | 42   | 70   |
| Oribacterium sp._oral_taxon_102                     | 14   | 10   | 19   | 21    | 9    | 13   | 33   | 24   | 147  | 251  |
| Parvimonas_unclassified                             | 256  | 227  | 273  | 466   | 570  | 790  | 178  | 274  | 215  | 187  |
| Parvimonas micra_oral_taxon_111                     | 253  | 372  | 383  | 427   | 203  | 323  | 267  | 210  | 66   | 96   |
| Pasteurellaceae_unclassified                        | 853  | 967  | 2015 | 1817  | 1010 | 1732 | 508  | 530  | 656  | 391  |
| Peptococcus sp._oral_taxon_167                      | 315  | 221  | 1262 | 1726  | 573  | 646  | 146  | 62   | 412  | 437  |
| Peptostreptococcaceae_[XII][G-1]sp._oral_taxon_383  | 157  | 125  | 118  | 150   | 75   | 83   | 192  | 129  | 143  | 111  |
| Peptostreptococcaceae_[XII][G-2]sp._oral_taxon_091  | 40   | 38   | 105  | 116   | 55   | 29   | 40   | 18   | 24   | 9    |
| Peptostreptococcaceae_[XII][G-4]                    | 208  | 163  | 196  | 104   | 193  | 85   | 263  | 239  | 141  | 58   |
| Peptostreptococcaceae_[XII][G-5]sp._oral_taxon_493  | 123  | 143  | 817  | 1054  | 337  | 237  | 340  | 201  | 162  | 71   |
| Peptostreptococcaceae_[XII][G-7]sp._oral_taxon_081  | 46   | 57   | 126  | 135   | 78   | 10   | 99   | 75   | 69   | 51   |
| Peptostreptococcaceae_[XII]_unclassified            | 310  | 144  | 559  | 161   | 211  | 84   | 531  | 365  | 598  | 244  |
| Peptostreptococcaceae_[XIII][G-1]sp._oral_taxon_113 | 139  | 158  | 15   | 12    | 550  | 624  | 676  | 779  | 424  | 238  |
| Peptostreptococcaceae_[XIII][G-2]sp._oral_taxon_790 | 125  | 76   | 28   | 35    | 233  | 194  | 356  | 293  | 516  | 218  |
| Peptostreptococcaceae_[XIII]_unclassified           | 523  | 575  | 296  | 334   | 885  | 759  | 935  | 495  | 762  | 465  |
| Peptostreptococcus stomatis_oral_taxon_112          | 302  | 283  | 294  | 109   | 359  | 217  | 708  | 315  | 180  | 67   |
| Porphyromonadaceae_unclassified                     | 14   | 26   | 5    | 6     | 329  | 568  | 1426 | 2367 | 539  | 719  |
| Porphyromonas_unclassified                          | 25   | 47   | 70   | 116   | 53   | 82   | 7    | 7    | 15   | 13   |
| Porphyromonas catoniae_oral_taxon_283               | 48   | 98   | 82   | 140   | 0    | 1    | 4    | 7    | 14   | 13   |
| Porphyromonas endodontalis_oral_taxon_273           | 1103 | 892  | 1396 | 1454  | 1587 | 1550 | 1013 | 815  | 1014 | 90   |
| Porphyromonas gingivalis_oral_taxon_619             | 2510 | 1601 | 5305 | 8000  | 2282 | 2077 | 2611 | 2151 | 1909 | 884  |
| Porphyromonas sp._oral_taxon_279                    | 1224 | 1360 | 9812 | 15298 | 5929 | 9553 | 2392 | 1179 | 1034 | 525  |
| Prevotella_unclassified                             | 4319 | 2574 | 3720 | 3590  | 4231 | 4678 | 8130 | 7109 | 1229 | 337  |
| Prevotella baroniae_oral_taxon_553                  | 96   | 183  | 41   | 64    | 68   | 70   | 126  | 186  | 58   | 87   |
| Prevotella buccae_oral_taxon_560                    | 719  | 915  | 116  | 151   | 307  | 525  | 217  | 182  | 2230 | 3745 |
| Prevotellaceae_unclassified                         |      |      |      |       |      |      |      |      |      |      |
| Prevotella dentalis_oral_taxon_583                  | 278  | 245  | 139  | 126   | 111  | 180  | 317  | 233  | 533  | 683  |
| Prevotella denticola_oral_taxon_291                 | 8    | 14   | 0    | 0     | 0    | 0    | 96   | 129  | 0    | 0    |

|                                                   |      |      |      |      |      |      |      |      |      |      |
|---------------------------------------------------|------|------|------|------|------|------|------|------|------|------|
| Prevotella enoeca_oral_taxon_600                  | 1947 | 1248 | 2076 | 2771 | 1102 | 928  | 670  | 735  | 813  | 591  |
| Prevotella fusca_oral_taxon_782                   | 285  | 312  | 365  | 263  | 1263 | 1291 | 2660 | 4602 | 380  | 522  |
| Prevotella intermedia_oral_taxon_643              | 303  | 674  | 27   | 23   | 6    | 7    | 526  | 1277 | 13   | 20   |
| Prevotella maculosa_oral_taxon_289                | 195  | 193  | 110  | 170  | 1    | 2    | 27   | 42   | 54   | 53   |
| Prevotella marshii_oral_taxon_665                 | 120  | 269  | 28   | 48   | 0    | 0    | 18   | 29   | 18   | 31   |
| Prevotella melaninogenica_oral_taxon_469          |      |      |      |      |      |      |      |      |      |      |
| Prevotella micans_oral_taxon_378                  |      |      |      |      |      |      |      |      |      |      |
| Prevotella nigrescens_oral_taxon_693              |      |      |      |      |      |      |      |      |      |      |
| Prevotella oralis_oral_taxon_705                  | 155  | 200  | 113  | 187  | 0    | 1    | 19   | 42   | 0    | 0    |
| Prevotella oris_oral_taxon_311                    | 84   | 76   | 47   | 53   | 13   | 6    | 361  | 496  | 119  | 115  |
| Prevotella oulorum_oral_taxon_288                 |      |      |      |      |      |      |      |      |      |      |
| Prevotella saccharolytica_oral_taxon_781          | 142  | 171  | 111  | 183  | 3    | 5    | 81   | 157  | 150  | 185  |
| Prevotella sp._oral_taxon_299                     | 70   | 122  | 2484 | 4301 | 1967 | 3397 | 7    | 6    | 15   | 14   |
| Prevotella sp._oral_taxon_300                     | 124  | 204  | 2    | 3    | 0    | 0    | 27   | 28   | 78   | 131  |
| Prevotella sp._oral_taxon_304                     | 1299 | 969  | 4159 | 6059 | 1809 | 1308 | 3106 | 2354 | 722  | 566  |
| Prevotella sp._oral_taxon_313                     | 1008 | 1446 | 3328 | 5135 | 420  | 359  | 1730 | 952  | 780  | 1151 |
| Prevotella sp._oral_taxon_315                     | 290  | 306  | 158  | 269  | 137  | 167  | 131  | 63   | 133  | 84   |
| Prevotella sp._oral_taxon_317                     | 1401 | 1835 | 978  | 1561 | 19   | 32   | 1512 | 2625 | 247  | 192  |
| Prevotella sp._oral_taxon_376                     | 150  | 228  | 93   | 29   | 38   | 49   | 69   | 98   | 5    | 9    |
| Prevotella sp._oral_taxon_443                     | 61   | 71   | 128  | 121  | 426  | 633  | 649  | 463  | 1747 | 1641 |
| Prevotella sp._oral_taxon_472                     | 65   | 118  | 23   | 39   | 0    | 0    | 22   | 52   | 73   | 75   |
| Prevotella sp._oral_taxon_515                     |      |      |      |      |      |      |      |      |      |      |
| Prevotella sp._oral_taxon_526                     | 1429 | 931  | 2831 | 4475 | 4531 | 4582 | 6078 | 7531 | 6920 | 5371 |
| Prevotella sp._oral_taxon_820                     | 807  | 617  | 454  | 129  | 144  | 108  | 854  | 454  | 843  | 626  |
| Prevotellaceae_unclassified                       | 32   | 42   | 61   | 104  | 7    | 12   | 60   | 109  | 48   | 71   |
| Proteobacteria_unclassified                       | 45   | 73   | 33   | 22   | 48   | 58   | 60   | 87   | 43   | 51   |
| Pyramidobacter piscolens_oral_taxon_357           | 483  | 770  | 373  | 567  | 221  | 187  | 826  | 715  | 296  | 410  |
| Rothia_unclassified                               |      |      |      |      |      |      |      |      |      |      |
| Scardovia wiggisiae_oral_taxon_195                |      |      |      |      |      |      |      |      |      |      |
| Selenomonas_unclassified                          | 32   | 20   | 311  | 440  | 888  | 670  | 4133 | 3070 | 4196 | 3678 |
| Selenomonas dianaе_oral_taxon_139                 | 711  | 993  | 1494 | 2483 | 275  | 446  | 1828 | 2996 | 1343 | 1446 |
| Selenomonas sp._oral_taxon_501                    | 186  | 168  | 113  | 173  | 16   | 21   | 560  | 749  | 254  | 215  |
| Selenomonas sputigena_oral_taxon_151              | 4814 | 4290 | 4345 | 5147 | 336  | 298  | 7844 | 7899 | 4168 | 5278 |
| Shuttleworthia satelles_oral_taxon_095            | 23   | 29   | 5    | 4    | 5    | 2    | 12   | 22   | 109  | 184  |
| Solobacterium moorei_oral_taxon_678               | 23   | 36   | 6    | 4    | 21   | 36   | 58   | 51   | 36   | 31   |
| SR1_[G-1]                                         | 18   | 18   | 1656 | 2867 | 1118 | 1937 | 53   | 32   | 6    | 8    |
| SR1_[G-1]sp._oral_taxon_345                       | 764  | 681  | 605  | 902  | 1492 | 1415 | 1761 | 1871 | 1059 | 678  |
| SR1_[G-1]sp._oral_taxon_874                       | 18   | 24   | 57   | 75   | 2    | 3    | 29   | 61   | 40   | 53   |
| SR1_[G-1]sp._oral_taxon_875                       | 59   | 123  | 18   | 27   | 2    | 3    | 57   | 69   | 41   | 24   |
| Streptococcus_unclassified                        | 340  | 244  | 989  | 866  | 535  | 529  | 1827 | 1529 | 218  | 101  |
| Streptococcus anginosus_oral_taxon_543            |      |      |      |      |      |      |      |      |      |      |
| Streptococcus downei_oral_taxon_594               | 2    | 2    | 4    | 6    | 0    | 0    | 247  | 370  | 0    | 0    |
| Streptococcus mutans_oral_taxon_686               |      |      |      |      |      |      |      |      |      |      |
| Streptococcus parasanguinis_II_oral_taxon_411     | 1877 | 1211 | 3508 | 3007 | 1634 | 1913 | 3347 | 3227 | 1039 | 179  |
| Streptococcus sp._oral_taxon_058                  | 591  | 526  | 5603 | 5111 | 2482 | 4115 | 5607 | 6278 | 701  | 304  |
| Syntrophomonadaceae_[VIII][G-1]sp._oral_taxon_435 | 83   | 82   | 85   | 142  | 110  | 99   | 233  | 255  | 370  | 160  |
| Tannerella                                        | 186  | 412  | 34   | 41   | 116  | 180  | 383  | 740  | 40   | 68   |
| Tannerella forsythia_oral_taxon_613               | 532  | 673  | 125  | 48   | 510  | 480  | 395  | 280  | 436  | 102  |
| Tannerella sp._oral_taxon_286                     | 160  | 177  | 185  | 266  | 20   | 26   | 85   | 71   | 192  | 181  |
| Tannerella sp._oral_taxon_916                     | 107  | 151  | 41   | 72   | 0    | 0    | 73   | 129  | 122  | 170  |
| TM7_[G-3]sp._oral_taxon_351                       |      |      |      |      |      |      |      |      |      |      |
| Treponema_unclassified                            | 3044 | 1765 | 3867 | 1383 | 5016 | 2664 | 6065 | 4387 | 4935 | 3858 |
| Treponema amylovorum_oral_taxon_541               | 125  | 279  | 0    | 0    | 0    | 0    | 0    | 1    | 16   | 28   |
| Treponema denticola_oral_taxon_584                | 3184 | 2051 | 2841 | 2107 | 3711 | 2787 | 5012 | 2216 | 6294 | 2937 |
| Treponema lecithinolyticum_oral_taxon_653         | 641  | 843  | 805  | 884  | 375  | 212  | 77   | 47   | 450  | 374  |
| Treponema maltophilum_oral_taxon_664              | 549  | 178  | 500  | 368  | 338  | 269  | 767  | 903  | 679  | 261  |
| Treponema parvum_oral_taxon_724                   | 74   | 42   | 66   | 60   | 44   | 34   | 94   | 88   | 134  | 74   |
| Treponema pectinovorum_oral_taxon_725             | 62   | 73   | 42   | 34   | 15   | 9    | 36   | 19   | 82   | 109  |
| Treponema socranskii_oral_taxon_769               | 673  | 679  | 357  | 469  | 16   | 18   | 306  | 312  | 578  | 678  |
| Treponema sp._oral_taxon_237                      | 148  | 206  | 913  | 1476 | 26   | 18   | 187  | 323  | 310  | 513  |
| Treponema sp._oral_taxon_239                      | 45   | 43   | 177  | 169  | 222  | 146  | 226  | 267  | 203  | 236  |



|                                         |      |      |      |      |      |      |       |       |      |      |
|-----------------------------------------|------|------|------|------|------|------|-------|-------|------|------|
| Treponema sp._oral_taxon_242            | 62   | 67   | 85   | 82   | 50   | 62   | 56    | 60    | 14   | 18   |
| Treponema sp._oral_taxon_246            | 996  | 1707 | 277  | 215  | 1451 | 951  | 166   | 264   | 622  | 428  |
| Treponema sp._oral_taxon_249            | 95   | 86   | 280  | 407  | 449  | 774  | 837   | 553   | 874  | 913  |
| Treponema sp._oral_taxon_250            | 219  | 203  | 362  | 440  | 420  | 334  | 255   | 214   | 316  | 140  |
| Treponema sp._oral_taxon_252            | 26   | 44   | 109  | 103  | 217  | 282  | 202   | 396   | 22   | 20   |
| Treponema sp._oral_taxon_254            | 39   | 38   | 87   | 99   | 29   | 26   | 65    | 53    | 84   | 133  |
| Treponema sp._oral_taxon_255            | 52   | 83   | 27   | 23   | 140  | 205  | 151   | 290   | 100  | 64   |
| Treponema sp._oral_taxon_257            | 145  | 209  | 41   | 72   | 5    | 9    | 0     | 0     | 54   | 81   |
| Treponema sp._oral_taxon_258            | 146  | 127  | 754  | 955  | 631  | 370  | 766   | 524   | 576  | 311  |
| Treponema sp._oral_taxon_263            | 91   | 158  | 385  | 610  | 178  | 200  | 552   | 1113  | 404  | 572  |
| Treponema sp._oral_taxon_270            | 270  | 238  | 212  | 263  | 8    | 7    | 107   | 88    | 172  | 117  |
| Treponema sp._oral_taxon_271            | 24   | 26   | 133  | 88   | 187  | 182  | 188   | 262   | 49   | 77   |
| Treponema sp._oral_taxon_508            | 93   | 110  | 199  | 209  | 361  | 307  | 168   | 95    | 333  | 453  |
| Veillonella_unclassified                | 1282 | 1192 | 4483 | 4044 | 770  | 986  | 22920 | 20593 | 1680 | 1021 |
| Veillonellaceae_[G-1]_unclassified      | 253  | 167  | 901  | 731  | 796  | 66   | 979   | 488   | 522  | 376  |
| Veillonellaceae_[G-1]sp._oral_taxon_129 | 1182 | 1475 | 81   | 22   | 19   | 27   | 287   | 431   | 417  | 653  |
| Veillonellaceae_[G-1]sp._oral_taxon_145 | 74   | 142  | 0    | 0    | 246  | 426  | 140   | 196   | 153  | 132  |
| Veillonellaceae_[G-1]sp._oral_taxon_155 | 2727 | 2776 | 1543 | 2664 | 108  | 183  | 2126  | 4398  | 1064 | 937  |
| Veillonellaceae_unclassified            |      |      |      |      |      |      |       |       |      |      |
| Veillonella dispar_oral_taxon_160       | 0    | 1    | 3    | 2    | 0    | 0    | 117   | 182   | 0    | 1    |
| Veillonella parvula_oral_taxon_161      | 2832 | 2908 | 1012 | 762  | 34   | 51   | 4292  | 4765  | 3022 | 5150 |
| Veillonella sp._oral_taxon_780          | 43   | 86   | 961  | 1651 | 673  | 1165 | 5     | 5     | 12   | 21   |

24  
25  
26  
27

## Supplemental Table 5. OTU distribution in samples from Aged group.

| OTU ID                                     | Baseline |      | 0.5  |      | 1    |      | 3     |      | 5    |      |
|--------------------------------------------|----------|------|------|------|------|------|-------|------|------|------|
|                                            | Mean     | SD   | Mean | SD   | Mean | SD   | Mean  | SD   | Mean | SD   |
| Abiotrophia defectiva_oral_taxon_389       | 84       | 105  | 46   | 50   | 23   | 37   | 26    | 31   | 69   | 84   |
| Actinobaculum sp._oral_taxon_183           | 108      | 245  | 18   | 36   | 1    | 3    | 0     | 0    | 5    | 8    |
| Actinomyces_unclassified                   | 143      | 184  | 390  | 195  | 376  | 296  | 94    | 69   | 387  | 230  |
| Actinomyces sp._oral_taxon_171             | 73       | 151  | 286  | 135  | 44   | 55   | 39    | 37   | 300  | 493  |
| Actinomyces sp._oral_taxon_179             | 21       | 42   | 7    | 9    | 5    | 6    | 61    | 81   | 19   | 28   |
| Actinomyces sp._oral_taxon_180             | 1        | 45   | 51   | 45   | 46   | 88   | 43    | 85   | 7    | 13   |
| Actinomyces sp._oral_taxon_449             |          |      |      |      |      |      |       |      |      |      |
| Aggregatibacter_unclassified               | 156      | 1387 | 995  | 1493 | 47   | 88   | 4     | 5    | 1158 | 1534 |
| Aggregatibacter                            |          |      |      |      |      |      |       |      |      |      |
| actinomycetemcomitans_oral_taxon_531       | 1216     | 2102 | 1314 | 1601 | 554  | 949  | 190   | 280  | 980  | 1049 |
| Aggregatibacter sp._oral_taxon_458         | 30       | 20   | 14   | 21   | 22   | 40   | 1     | 1    | 216  | 531  |
| Aggregatibacter sp._oral_taxon_513         | 55       | 152  | 113  | 158  | 11   | 13   | 221   | 471  | 43   | 45   |
| Alloprevotella_unclassified                |          |      |      |      |      |      |       |      |      |      |
| Alloprevotella rava_oral_taxon_302         | 478      | 64   | 56   | 63   | 169  | 263  | 26    | 22   | 184  | 216  |
| Alloprevotella sp._oral_taxon_308          | 40       | 36   | 30   | 38   | 64   | 49   | 16    | 15   | 19   | 22   |
| Alloprevotella sp._oral_taxon_473          | 379      | 688  | 453  | 767  | 156  | 159  | 169   | 159  | 621  | 1212 |
| Alloprevotella sp._oral_taxon_912          | 314      | 94   | 20   | 17   | 107  | 89   | 31    | 44   | 180  | 272  |
| Alloprevotella tanneriae_oral_taxon_466    | 637      | 337  | 102  | 149  | 813  | 875  | 48    | 49   | 394  | 541  |
| Atopobium_unclassified                     | 443      | 59   | 11   | 8    | 92   | 81   | 383   | 291  | 272  | 667  |
| Atopobium parvulum_oral_taxon_723          | 117      | 121  | 67   | 133  | 7    | 10   | 9     | 13   | 10   | 10   |
| Atopobium sp._oral_taxon_199               | 242      | 181  | 150  | 198  | 56   | 98   | 27    | 26   | 71   | 81   |
| Atopobium sp._oral_taxon_810               | 9        | 287  | 155  | 313  | 65   | 91   | 54    | 64   | 20   | 19   |
| Bacteria_unclassified                      | 2940     | 2337 | 3736 | 2613 | 4904 | 2085 | 10294 | 2959 | 5742 | 4291 |
| Bacteroidaceae [G-1] sp._oral_taxon_272    | 444      | 320  | 198  | 353  | 438  | 377  | 1094  | 1336 | 127  | 151  |
| Bacteroidales [G-2]sp._oral_taxon_274      | 529      | 537  | 545  | 600  | 381  | 427  | 326   | 544  | 670  | 491  |
| Bacteroidales_unclassified                 | 260      | 1056 | 1038 | 1155 | 413  | 375  | 157   | 85   | 304  | 377  |
| Bacteroides_unclassified                   | 216      | 12   | 12   | 12   | 84   | 136  | 393   | 857  | 612  | 1135 |
| Bacteroides heparinolyticus_oral_taxon_630 | 181      | 313  | 614  | 220  | 948  | 876  | 542   | 497  | 317  | 371  |
| Bacteroides tectus_oral_taxon_787          | 0        | 0    | 0    | 0    | 77   | 105  | 627   | 1111 | 3    | 4    |
| Bacteroides zoogloformans_oral_taxon_465   | 0        | 41   | 21   | 45   | 8    | 9    | 83    | 155  | 1    | 3    |
| Bacteroidetes [G-3]                        | 73       | 256  | 225  | 279  | 500  | 479  | 825   | 844  | 330  | 305  |
| Bacteroidetes [G-3]sp._oral_taxon_280      | 86       | 93   | 234  | 76   | 148  | 165  | 28    | 28   | 106  | 73   |
| Bacteroidetes [G-3]sp._oral_taxon_365      | 420      | 79   | 67   | 88   | 1295 | 945  | 165   | 118  | 95   | 101  |
| Bacteroidetes [G-3]sp._oral_taxon_436      | 9        | 632  | 435  | 678  | 94   | 67   | 142   | 107  | 74   | 107  |
| Bacteroidetes [G-3]sp._oral_taxon_503      | 77       | 32   | 25   | 31   | 79   | 112  | 29    | 36   | 60   | 84   |
| Bacteroidetes [G-4]sp._oral_taxon_509      | 2        | 101  | 50   | 111  | 133  | 261  | 53    | 115  | 12   | 19   |
| Bacteroidetes [G-5]sp._oral_taxon_505      | 191      | 288  | 194  | 288  | 211  | 213  | 54    | 29   | 141  | 120  |
| Bacteroidetes [G-5]sp._oral_taxon_507      | 31       | 85   | 60   | 92   | 125  | 190  | 35    | 68   | 115  | 150  |
| Bacteroidetes [G-5]sp._oral_taxon_511      | 283      | 109  | 54   | 45   | 56   | 80   | 75    | 148  | 149  | 137  |
| Bacteroidetes_unclassified                 | 2980     | 1836 | 1052 | 2002 | 4969 | 3808 | 5076  | 7391 | 5025 | 6579 |
| Bergeyella_unclassified                    | 58       | 18   | 9    | 12   | 12   | 27   | 19    | 37   | 67   | 68   |
| Bergeyellasp._oral_taxon_907               | 46       | 18   | 19   | 20   | 5    | 4    | 7     | 9    | 13   | 18   |
| Burkholderiaceae_unclassified              | 24       | 73   | 132  | 80   | 18   | 29   | 7     | 15   | 19   | 28   |
| Burkholderiales_unclassified               | 15       | 122  | 107  | 134  | 8    | 13   | 2     | 2    | 30   | 25   |
| Butyrivibriosp._oral_taxon_094             | 50       | 42   | 61   | 45   | 119  | 107  | 193   | 261  | 192  | 179  |
| Campylobacter_unclassified                 | 303      | 692  | 447  | 734  | 54   | 67   | 44    | 28   | 186  | 89   |
| Campylobacter concisus_oral_taxon_575      | 40       | 16   | 13   | 18   | 10   | 13   | 1     | 2    | 26   | 26   |
| Campylobacter rectus_oral_taxon_748        | 366      | 415  | 776  | 462  | 371  | 261  | 216   | 163  | 574  | 428  |
| Campylobacter sp._oral_taxon_044           | 25       | 54   | 5    | 7    | 78   | 145  | 2     | 3    | 76   | 115  |
| Capnocytophaga_unclassified                | 1240     | 1365 | 1158 | 1329 | 340  | 384  | 293   | 336  | 1392 | 1312 |
| Capnocytophaga granulosa_oral_taxon_325    | 140      | 84   | 100  | 92   | 39   | 60   | 57    | 90   | 167  | 124  |
| Capnocytophagasp._oral_taxon_326           | 29       | 109  | 94   | 115  | 0    | 1    | 0     | 0    | 29   | 51   |
| Cardiobacterium_unclassified               | 53       | 81   | 78   | 88   | 10   | 15   | 11    | 23   | 71   | 82   |
| Cardiobacterium hominis_oral_taxon_633     | 80       | 141  | 47   | 77   | 14   | 29   | 1     | 2    | 47   | 32   |
| Cardiobacterium valvulum_oral_taxon_540    | 34       | 176  | 99   | 197  | 8    | 13   | 8     | 17   | 7    | 9    |
| Catonella morbi_oral_taxon_165             | 826      | 632  | 1072 | 660  | 761  | 488  | 384   | 306  | 746  | 572  |
| Catonella sp._oral_taxon_451               | 18       | 18   | 32   | 19   | 60   | 45   | 20    | 22   | 27   | 21   |
| Chloroflexi [G-1]sp._oral_taxon_439        | 888      | 445  | 757  | 483  | 2670 | 2440 | 2018  | 1533 | 1865 | 1416 |
| Clostridiales [F-1][G-1]sp._oral_taxon_093 | 82       | 127  | 83   | 81   | 107  | 63   | 50    | 56   | 35   | 30   |

|                                                     |      |      |       |       |      |      |      |      |       |       |
|-----------------------------------------------------|------|------|-------|-------|------|------|------|------|-------|-------|
| Clostridiales [F-1][G-2]sp.oral_taxon_402           | 56   | 1561 | 1330  | 1636  | 570  | 390  | 363  | 212  | 75    | 98    |
| Clostridiales [F-2][G-1]sp.oral_taxon_075           | 313  | 123  | 84    | 92    | 456  | 464  | 127  | 108  | 624   | 840   |
| Clostridiales [F-2][G-2]sp.oral_taxon_085           | 91   | 237  | 159   | 262   | 208  | 191  | 527  | 982  | 313   | 509   |
| Clostridiales [F-2][G-3]sp.oral_taxon_381           | 38   | 20   | 17    | 21    | 165  | 94   | 608  | 491  | 23    | 50    |
| Clostridiales [F-2]_unclassified                    | 10   | 31   | 15    | 34    | 129  | 187  | 11   | 19   | 6     | 12    |
| Clostridiales_unclassified                          | 251  | 1121 | 923   | 1204  | 1256 | 968  | 585  | 372  | 227   | 162   |
| Comomonadaceae_unclassified                         | 1    | 216  | 106   | 236   | 4    | 9    | 18   | 40   | 51    | 120   |
| Coriobacteriaceae_unclassified                      | 11   | 5    | 4     | 5     | 13   | 8    | 24   | 24   | 42    | 65    |
| Corynebacterium durum_oral_taxon_595                |      |      |       |       |      |      |      |      |       |       |
| Corynebacterium matruchotii_oral_taxon_666          | 575  | 151  | 256   | 153   | 328  | 560  | 154  | 254  | 672   | 763   |
| Desulfobulbus sp.oral_taxon_041                     | 526  | 494  | 349   | 381   | 376  | 226  | 487  | 631  | 881   | 809   |
| Desulfomicrobium orale_oral_taxon_703               | 167  | 934  | 876   | 1036  | 822  | 995  | 260  | 347  | 470   | 620   |
| Desulfovibrio fairfieldensis_oral_taxon_605         | 4    | 490  | 282   | 534   | 14   | 23   | 88   | 167  | 291   | 613   |
| Desulfovibrio sp.oral_taxon_040                     | 10   | 1    | 0     | 0     | 5    | 5    | 49   | 79   | 28    | 39    |
| Dialister invisus_oral_taxon_118                    | 545  | 444  | 400   | 470   | 715  | 512  | 135  | 72   | 118   | 158   |
| Eikenella_unclassified                              |      |      |       |       |      |      |      |      |       |       |
| Eikenella corrodens_oral_taxon_577                  | 40   | 253  | 218   | 267   | 11   | 11   | 11   | 9    | 55    | 73    |
| Erysipelotrichaceae_unclassified                    | 10   | 7    | 6     | 7     | 102  | 207  | 8    | 13   | 3     | 5     |
| Escherichiacoli_oral_taxon_574                      | 18   | 27   | 58    | 25    | 157  | 204  | 35   | 13   | 122   | 126   |
| Eubacterium [XI][G-1]infirmum_oral_taxon_105        | 726  | 819  | 877   | 887   | 290  | 256  | 285  | 207  | 240   | 240   |
| Eubacterium [XI][G-3]brachy_oral_taxon_557          | 148  | 410  | 496   | 408   | 187  | 186  | 17   | 14   | 99    | 130   |
| Eubacterium [XI][G-6]                               | 22   | 34   | 27    | 35    | 64   | 53   | 40   | 43   | 40    | 52    |
| Eubacterium [XI][G-6]minutum_oral_taxon_673         | 21   | 28   | 2     | 1     | 5    | 6    | 49   | 94   | 71    | 98    |
| Filifactor alocis_oral_taxon_539                    | 275  | 626  | 1243  | 649   | 1410 | 682  | 954  | 737  | 827   | 815   |
| Firmicutes_unclassified                             | 76   | 204  | 166   | 219   | 215  | 145  | 311  | 277  | 217   | 110   |
| Fretibacterium_unclassified                         | 919  | 1839 | 390   | 309   | 215  | 265  | 41   | 59   | 138   | 167   |
| Fretibacterium fastidiosum_oral_taxon_363           | 1392 | 2159 | 3192  | 2361  | 2303 | 1578 | 1884 | 1725 | 2289  | 1631  |
| Fretibacterium sp.oral_taxon_361                    | 2625 | 7001 | 12085 | 6578  | 8737 | 8435 | 5774 | 6721 | 12939 | 11595 |
| Fusobacterium_unclassified                          | 5597 | 9275 | 19366 | 10269 | 6143 | 5586 | 3666 | 2883 | 9737  | 8669  |
| Fusobacterium nucleatum ss vincentii_oral_taxon_200 | 159  | 64   | 94    | 68    | 29   | 56   | 29   | 33   | 77    | 138   |
| Fusobacterium periodonticum_oral_taxon_201          | 17   | 9    | 1     | 2     | 63   | 141  | 1    | 2    | 107   | 282   |
| Fusobacterium sp.oral_taxon_203                     | 2442 | 89   | 50    | 98    | 1    | 1    | 76   | 163  | 30    | 36    |
| Gemella morbillorum_oral_taxon_046                  | 514  | 1926 | 1255  | 2144  | 137  | 198  | 291  | 457  | 800   | 1347  |
| Haemophilus_unclassified                            | 66   | 85   | 63    | 95    | 6    | 11   | 94   | 188  | 29    | 27    |
| Haemophilus sp.oral_taxon_035                       | 136  | 20   | 16    | 22    | 6    | 6    | 5    | 5    | 182   | 222   |
| Helicobacter pylori_oral_taxon_812                  | 61   | 142  | 10    | 13    | 45   | 48   | 26   | 39   | 15    | 21    |
| Johnsonella ignava_oral_taxon_635                   | 164  | 723  | 798   | 797   | 50   | 79   | 10   | 15   | 131   | 119   |
| Johnsonella sp.oral_taxon_166                       | 167  | 74   | 18    | 13    | 33   | 19   | 4    | 5    | 84    | 95    |
| Kingella sp.oral_taxon_459                          |      |      |       |       |      |      |      |      |       |       |
| Lachnoanaerobaculum_unclassified                    | 162  | 34   | 29    | 35    | 48   | 69   | 1    | 2    | 38    | 41    |
| Lachnoanaerobaculumsp.oral_taxon_083                | 66   | 90   | 112   | 100   | 246  | 163  | 535  | 1014 | 302   | 307   |
| Lachnoanaerobaculumsp.oral_taxon_496                | 29   | 25   | 3     | 3     | 51   | 60   | 29   | 53   | 73    | 49    |
| Lachnoanaerobaculum umeaense_oral_taxon_107         | 18   | 134  | 91    | 150   | 52   | 57   | 36   | 25   | 2     | 2     |
| Lachnospiraceae [G-2]_unclassified                  | 43   | 16   | 13    | 17    | 1    | 1    | 1    | 2    | 26    | 30    |
| Lachnospiraceae [G-2]sp.oral_taxon_088              | 73   | 135  | 207   | 147   | 50   | 59   | 24   | 33   | 155   | 124   |
| Lachnospiraceae [G-2]sp.oral_taxon_096              | 417  | 1    | 1     | 1     | 7    | 9    | 29   | 33   | 70    | 126   |
| Lachnospiraceae [G-3]sp.oral_taxon_100              | 453  | 864  | 630   | 948   | 357  | 394  | 226  | 255  | 638   | 604   |
| Lachnospiraceae [G-5]sp.oral_taxon_080              | 13   | 52   | 43    | 57    | 19   | 16   | 17   | 15   | 20    | 15    |
| Lachnospiraceae [G-6]sp.oral_taxon_090              | 18   | 41   | 31    | 43    | 23   | 29   | 31   | 34   | 18    | 24    |
| Lachnospiraceae [G-8]sp.oral_taxon_500              | 114  | 475  | 501   | 515   | 332  | 144  | 225  | 229  | 319   | 279   |
| Lachnospiraceae [XIVa]_unclassified                 | 87   | 121  | 183   | 135   | 240  | 130  | 197  | 183  | 197   | 136   |
| Lactobacillales_unclassified                        | 63   | 21   | 5     | 2     | 4    | 3    | 3    | 3    | 64    | 77    |
| Lactobacillus                                       | 53   | 1    | 0     | 0     | 3    | 6    | 1    | 1    | 121   | 318   |
| Lactobacillus [XVII] catenaformis_oral_taxon_569    | 6    | 46   | 33    | 50    | 52   | 64   | 48   | 63   | 12    | 12    |
| Lactobacillus gasseri_oral_taxon_615                | 0    | 1    | 1     | 1     | 0    | 0    | 1    | 1    | 159   | 418   |
| Lactobacillus salivarius_oral_taxon_756             | 302  | 1    | 1     | 1     | 4    | 9    | 0    | 1    | 1331  | 3514  |
| Lactobacillus sp.oral_taxon_052                     | 22   | 0    | 0     | 0     | 0    | 0    | 0    | 0    | 95    | 251   |

|                                                     |      |       |      |       |      |      |      |      |      |      |
|-----------------------------------------------------|------|-------|------|-------|------|------|------|------|------|------|
| Lactobacillus vaginalis_oral_taxon_051              | 214  | 0     | 0    | 0     | 0    | 0    | 0    | 0    | 0    | 0    |
| Leptotrichia_unclassified                           | 3715 | 754   | 1053 | 652   | 1339 | 1580 | 1327 | 972  | 4107 | 2657 |
| Leptotrichia goodfellowii_oral_taxon_845            | 267  | 562   | 193  | 170   | 1    | 3    | 0    | 1    | 242  | 443  |
| Leptotrichia hongkongensis_oral_taxon_213           | 1486 | 251   | 68   | 70    | 310  | 425  | 14   | 10   | 247  | 407  |
| Leptotrichia sp._oral_taxon_212                     | 93   | 454   | 418  | 505   | 3    | 4    | 17   | 30   | 523  | 878  |
| Leptotrichia sp._oral_taxon_223                     | 206  | 90    | 71   | 96    | 80   | 57   | 430  | 578  | 216  | 470  |
| Leptotrichia sp._oral_taxon_225                     | 541  | 203   | 178  | 222   | 96   | 180  | 296  | 525  | 279  | 436  |
| Leptotrichia sp._oral_taxon_392                     | 300  | 311   | 171  | 265   | 70   | 124  | 88   | 122  | 153  | 189  |
| Leptotrichia sp._oral_taxon_498                     | 1407 | 3     | 1    | 1     | 7    | 15   | 89   | 180  | 50   | 80   |
| Leptotrichia sp._oral_taxon_847                     | 156  | 96    | 2    | 4     | 2    | 3    | 16   | 28   | 70   | 153  |
| Leptotrichiaceae_unclassified                       |      |       |      |       |      |      |      |      |      |      |
| Megasphaera                                         |      |       |      |       |      |      |      |      |      |      |
| Megasphaera<br>micronuciformis_oral_taxon_122       | 2854 | 111   | 97   | 116   | 28   | 30   | 441  | 690  | 213  | 539  |
| Mitsuokella sp._oral_taxon_131                      | 1584 | 0     | 0    | 0     | 0    | 1    | 0    | 0    | 31   | 81   |
| Mitsuokella sp._oral_taxon_521                      | 3    | 6     | 3    | 7     | 81   | 179  | 20   | 45   | 31   | 42   |
| Mogibacterium timidum_oral_taxon_042                | 32   | 32    | 21   | 16    | 52   | 51   | 20   | 17   | 16   | 14   |
| Mogibacterium vescum_oral_taxon_008                 | 37   | 222   | 156  | 239   | 71   | 70   | 27   | 14   | 25   | 34   |
| Mollicutes_[G-1] sp._oral_taxon_504                 | 36   | 45    | 59   | 43    | 82   | 61   | 164  | 272  | 217  | 255  |
| Mollicutes_[G-2] sp._oral_taxon_906                 | 90   | 125   | 98   | 138   | 209  | 94   | 84   | 93   | 130  | 98   |
| Moraxella catarrhalis_oral_taxon_833                | 197  | 69    | 45   | 77    | 9    | 15   | 32   | 68   | 36   | 43   |
| Moryella sp._oral_taxon_097                         | 53   | 431   | 269  | 467   | 66   | 56   | 191  | 177  | 73   | 127  |
| Moryella sp._oral_taxon_373                         | 59   | 93    | 93   | 103   | 355  | 405  | 166  | 137  | 105  | 81   |
| Mycoplasma                                          | 92   | 116   | 67   | 126   | 25   | 44   | 4    | 4    | 42   | 53   |
| Neisseria_unclassified                              | 38   | 122   | 65   | 129   | 1    | 3    | 3    | 5    | 131  | 299  |
| Neisseriaceae_unclassified                          | 79   | 20    | 20   | 23    | 2    | 2    | 10   | 13   | 42   | 48   |
| Neisseria oralis_oral_taxon_014                     | 98   | 101   | 59   | 112   | 52   | 89   | 23   | 24   | 73   | 71   |
| Olsenella sp._oral_taxon_807                        |      |       |      |       |      |      |      |      |      |      |
| Oribacterium                                        | 44   | 238   | 167  | 264   | 291  | 317  | 40   | 25   | 30   | 24   |
| Oribacterium sp._oral_taxon_078                     | 87   | 68    | 15   | 23    | 6    | 6    | 21   | 25   | 20   | 24   |
| Oribacterium sp._oral_taxon_102                     | 15   | 214   | 171  | 226   | 79   | 72   | 104  | 133  | 12   | 13   |
| Parvimonas_unclassified                             | 17   | 2218  | 1394 | 2409  | 1    | 2    | 3    | 2    | 13   | 32   |
| Parvimonas micra_oral_taxon_111                     | 140  | 1279  | 1382 | 1299  | 394  | 384  | 293  | 156  | 93   | 109  |
| Pasteurellaceae_unclassified                        | 625  | 708   | 463  | 748   | 76   | 100  | 208  | 300  | 835  | 930  |
| Peptococcus sp._oral_taxon_167                      | 75   | 536   | 753  | 512   | 310  | 328  | 120  | 108  | 167  | 160  |
| Peptostreptococcaceae_[XI][G-1]sp._oral_taxon_383   | 105  | 98    | 47   | 42    | 117  | 51   | 176  | 174  | 185  | 146  |
| Peptostreptococcaceae_[XI][G-2]sp._oral_taxon_091   | 60   | 52    | 96   | 57    | 92   | 70   | 31   | 33   | 34   | 21   |
| Peptostreptococcaceae_[XI][G-4]                     | 102  | 539   | 651  | 567   | 355  | 334  | 233  | 195  | 356  | 364  |
| Peptostreptococcaceae_[XI][G-5]sp._oral_taxon_493   | 382  | 86    | 113  | 68    | 247  | 126  | 85   | 57   | 150  | 187  |
| Peptostreptococcaceae_[XI][G-7]sp._oral_taxon_081   | 217  | 83    | 108  | 91    | 46   | 47   | 48   | 73   | 155  | 329  |
| Peptostreptococcaceae_[XI]_unclassified             | 586  | 288   | 545  | 321   | 733  | 359  | 569  | 468  | 1107 | 1057 |
| Peptostreptococcaceae_[XIII][G-1]sp._oral_taxon_113 | 147  | 205   | 188  | 213   | 718  | 409  | 431  | 562  | 400  | 402  |
| Peptostreptococcaceae_[XIII][G-2]sp._oral_taxon_790 | 92   | 282   | 226  | 308   | 215  | 90   | 184  | 163  | 458  | 356  |
| Peptostreptococcaceae_[XIII]_unclassified           | 388  | 1485  | 1462 | 1650  | 1090 | 415  | 641  | 722  | 965  | 802  |
| Peptostreptococcus stomatis_oral_taxon_112          | 184  | 560   | 669  | 600   | 542  | 558  | 312  | 412  | 254  | 255  |
| Porphyromonadaceae_unclassified                     | 46   | 11123 | 8380 | 11833 | 8416 | 7525 | 1402 | 1931 | 2283 | 2861 |
| Porphyromonas_unclassified                          | 24   | 9     | 3    | 4     | 3    | 4    | 1    | 1    | 69   | 163  |
| Porphyromonas catoniae_oral_taxon_283               |      |       |      |       |      |      |      |      |      |      |
| Porphyromonas endodontalis_oral_taxon_273           | 550  | 1626  | 2417 | 1509  | 2140 | 1416 | 649  | 681  | 1027 | 665  |
| Porphyromonas gingivalis_oral_taxon_619             | 2197 | 4798  | 7745 | 5364  | 3198 | 2397 | 2375 | 2453 | 2926 | 2489 |
| Porphyromonas sp._oral_taxon_279                    | 1879 | 2486  | 1583 | 2748  | 440  | 541  | 383  | 510  | 2471 | 4766 |
| Prevotella_unclassified                             | 4940 | 1987  | 1919 | 2012  | 3098 | 3278 | 2029 | 1478 | 3263 | 3538 |
| Prevotella baroniae_oral_taxon_553                  | 467  | 1682  | 1384 | 1875  | 580  | 462  | 236  | 278  | 48   | 58   |
| Prevotella buccae_oral_taxon_560                    | 319  | 780   | 472  | 872   | 599  | 720  | 669  | 405  | 169  | 150  |
| Prevotellaceae_unclassified                         | 125  | 34    | 7    | 8     | 34   | 33   | 36   | 27   | 26   | 25   |
| Prevotella dentalis_oral_taxon_583                  | 227  | 157   | 142  | 168   | 543  | 324  | 312  | 287  | 323  | 202  |
| Prevotella denticola_oral_taxon_291                 | 5862 | 54    | 30   | 59    | 31   | 63   | 221  | 372  | 216  | 486  |

|                                                   |      |      |      |      |       |      |       |       |      |      |
|---------------------------------------------------|------|------|------|------|-------|------|-------|-------|------|------|
| Prevotella enoeca_oral_taxon_600                  | 1943 | 2875 | 2296 | 3201 | 740   | 983  | 154   | 88    | 864  | 845  |
| Prevotella fusca_oral_taxon_782                   | 314  | 1134 | 1589 | 1047 | 748   | 547  | 2879  | 2266  | 1054 | 1259 |
| Prevotella intermedia_oral_taxon_643              | 1140 | 1536 | 1109 | 1008 | 2941  | 3750 | 265   | 280   | 1151 | 1232 |
| Prevotella maculosa_oral_taxon_289                | 471  | 121  | 3    | 3    | 99    | 196  | 40    | 44    | 48   | 62   |
| Prevotella marshii_oral_taxon_665                 | 540  | 229  | 34   | 73   | 120   | 155  | 9     | 6     | 105  | 136  |
| Prevotella melaninogenica_oral_taxon_469          | 22   | 1    | 1    | 1    | 13    | 29   | 37    | 72    | 101  | 154  |
| Prevotella micans_oral_taxon_378                  | 265  | 21   | 10   | 21   | 131   | 235  | 9     | 15    | 111  | 110  |
| Prevotella nigrescens_oral_taxon_693              | 379  | 140  | 71   | 153  | 14    | 32   | 12    | 27    | 12   | 15   |
| Prevotella oralis_oral_taxon_705                  | 543  | 446  | 85   | 174  | 74    | 154  | 53    | 64    | 27   | 50   |
| Prevotella oris_oral_taxon_311                    | 1713 | 761  | 66   | 116  | 545   | 730  | 173   | 150   | 272  | 328  |
| Prevotella oulorum_oral_taxon_288                 | 668  | 40   | 3    | 4    | 1     | 3    | 14    | 29    | 50   | 121  |
| Prevotella saccharolytica_oral_taxon_781          | 159  | 63   | 38   | 21   | 39    | 78   | 9     | 15    | 126  | 118  |
| Prevotella sp._oral_taxon_299                     | 38   | 8    | 13   | 9    | 4     | 5    | 2     | 3     | 55   | 53   |
| Prevotella sp._oral_taxon_300                     | 648  | 27   | 20   | 29   | 6     | 8    | 29    | 51    | 85   | 157  |
| Prevotella sp._oral_taxon_304                     | 1447 | 747  | 1550 | 829  | 1863  | 2011 | 772   | 625   | 816  | 495  |
| Prevotella sp._oral_taxon_313                     | 414  | 7970 | 4541 | 8755 | 593   | 697  | 1505  | 1518  | 633  | 1372 |
| Prevotella sp._oral_taxon_315                     | 336  | 30   | 26   | 30   | 408   | 453  | 33    | 27    | 184  | 204  |
| Prevotella sp._oral_taxon_317                     | 941  | 278  | 303  | 208  | 217   | 306  | 232   | 211   | 616  | 619  |
| Prevotella sp._oral_taxon_376                     | 179  | 105  | 30   | 44   | 6     | 10   | 192   | 261   | 31   | 50   |
| Prevotella sp._oral_taxon_443                     | 164  | 539  | 454  | 566  | 870   | 456  | 607   | 326   | 974  | 1027 |
| Prevotella sp._oral_taxon_472                     |      |      |      |      |       |      |       |       |      |      |
| Prevotella sp._oral_taxon_515                     | 0    | 1    | 1    | 1    | 96    | 215  | 35    | 53    | 19   | 34   |
| Prevotella sp._oral_taxon_526                     | 4042 | 5074 | 4748 | 5264 | 6460  | 4069 | 1790  | 1355  | 2835 | 3471 |
| Prevotella sp._oral_taxon_820                     | 378  | 725  | 932  | 714  | 1298  | 1328 | 855   | 469   | 674  | 579  |
| Prevotellaceae_unclassified                       |      |      |      |      |       |      |       |       |      |      |
| Proteobacteria_unclassified                       | 26   | 14   | 10   | 13   | 183   | 313  | 13    | 12    | 89   | 168  |
| Pyramidobacter piscicolens_oral_taxon_357         | 659  | 973  | 942  | 1056 | 1080  | 869  | 2646  | 1544  | 593  | 866  |
| Rothia_unclassified                               |      |      |      |      |       |      |       |       |      |      |
| Scardovia wiggisiae_oral_taxon_195                | 1082 | 612  | 0    | 1    | 0     | 0    | 1     | 3     | 34   | 68   |
| Selenomonas_unclassified                          | 8035 | 1387 | 2227 | 998  | 4423  | 4732 | 3395  | 4904  | 5097 | 3639 |
| Selenomonas dianaie_oral_taxon_139                | 29   | 36   | 43   | 41   | 125   | 180  | 247   | 290   | 690  | 963  |
| Selenomonas sp._oral_taxon_501                    | 208  | 58   | 63   | 64   | 126   | 82   | 641   | 566   | 414  | 562  |
| Selenomonas sputigena_oral_taxon_151              | 6927 | 1886 | 2453 | 2105 | 10130 | 8589 | 15202 | 17876 | 6816 | 4270 |
| Shuttleworthia satelles_oral_taxon_095            | 573  | 123  | 74   | 135  | 9     | 13   | 37    | 31    | 58   | 60   |
| Solobacterium moorei_oral_taxon_678               | 24   | 331  | 181  | 363  | 95    | 154  | 55    | 57    | 17   | 25   |
| SR1_[G-1]                                         |      |      |      |      |       |      |       |       |      |      |
| SR1_[G-1]sp._oral_taxon_345                       | 546  | 916  | 788  | 1014 | 1513  | 769  | 460   | 397   | 563  | 366  |
| SR1_[G-1]sp._oral_taxon_874                       | 28   | 29   | 9    | 9    | 11    | 20   | 2     | 3     | 38   | 38   |
| SR1_[G-1]sp._oral_taxon_875                       | 4    | 437  | 216  | 478  | 20    | 43   | 20    | 39    | 18   | 34   |
| Streptococcus_unclassified                        | 261  | 121  | 255  | 134  | 141   | 102  | 214   | 151   | 790  | 1024 |
| Streptococcus anginosus_oral_taxon_543            | 675  | 230  | 113  | 252  | 0     | 0    | 0     | 0     | 3    | 4    |
| Streptococcus downei_oral_taxon_594               | 62   | 10   | 8    | 11   | 0     | 0    | 459   | 543   | 591  | 1553 |
| Streptococcus mutans_oral_taxon_686               | 104  | 34   | 18   | 37   | 0     | 0    | 7     | 8     | 24   | 58   |
| Streptococcus parasanguinis_II_oral_taxon_411     | 722  | 2763 | 2882 | 2971 | 504   | 703  | 818   | 753   | 1756 | 1776 |
| Streptococcus sp._oral_taxon_058                  | 658  | 1060 | 1054 | 1144 | 211   | 262  | 623   | 438   | 1874 | 2395 |
| Syntrophomonadaceae_[VIII][G-1]sp._oral_taxon_435 | 119  | 79   | 96   | 87   | 479   | 381  | 357   | 400   | 252  | 241  |
| Tannerella                                        | 164  | 19   | 21   | 21   | 91    | 45   | 38    | 32    | 128  | 215  |
| Tannerella forsythia_oral_taxon_613               | 321  | 470  | 763  | 497  | 456   | 315  | 264   | 253   | 482  | 416  |
| Tannerella sp._oral_taxon_286                     | 298  | 201  | 65   | 71   | 77    | 122  | 80    | 85    | 139  | 168  |
| Tannerella sp._oral_taxon_916                     | 0    | 10   | 8    | 11   | 144   | 212  | 113   | 252   | 265  | 452  |
| TM7_[G-3]sp._oral_taxon_351                       | 6    | 7    | 7    | 7    | 25    | 34   | 17    | 16    | 48   | 102  |
| Treponema_unclassified                            | 3345 | 2702 | 2923 | 1532 | 4234  | 1964 | 1916  | 1559  | 2887 | 1951 |
| Treponema amylovorum_oral_taxon_541               | 93   | 221  | 16   | 37   | 0     | 0    | 0     | 0     | 8    | 19   |
| Treponema denticola_oral_taxon_584                | 3662 | 2321 | 4972 | 2583 | 6768  | 2913 | 3086  | 2702  | 5673 | 3735 |
| Treponema lecithinolyticum_oral_taxon_653         | 276  | 1180 | 947  | 1294 | 255   | 240  | 28    | 44    | 311  | 356  |
| Treponema maltophilum_oral_taxon_664              | 504  | 617  | 1212 | 683  | 812   | 590  | 547   | 690   | 1327 | 1108 |
| Treponema parvum_oral_taxon_724                   | 101  | 71   | 104  | 77   | 164   | 39   | 134   | 110   | 195  | 122  |
| Treponema pectinovorum_oral_taxon_725             | 56   | 45   | 44   | 50   | 255   | 362  | 27    | 27    | 54   | 47   |
| Treponema socranskii_oral_taxon_769               | 995  | 566  | 296  | 464  | 476   | 275  | 725   | 1283  | 1190 | 1142 |
| Treponema sp._oral_taxon_237                      | 303  | 564  | 793  | 529  | 530   | 457  | 188   | 247   | 474  | 592  |
| Treponema sp._oral_taxon_239                      | 31   | 142  | 124  | 159  | 173   | 160  | 75    | 73    | 76   | 77   |

|                                         |      |      |      |      |      |      |      |      |       |       |
|-----------------------------------------|------|------|------|------|------|------|------|------|-------|-------|
| Treponema sp._oral_taxon_242            | 17   | 34   | 27   | 36   | 91   | 85   | 9    | 13   | 65    | 59    |
| Treponema sp._oral_taxon_246            | 812  | 2306 | 1152 | 2297 | 621  | 639  | 116  | 142  | 856   | 1466  |
| Treponema sp._oral_taxon_249            | 340  | 270  | 200  | 299  | 830  | 723  | 290  | 252  | 428   | 469   |
| Treponema sp._oral_taxon_250            | 308  | 127  | 203  | 109  | 419  | 245  | 137  | 84   | 322   | 478   |
| Treponema sp._oral_taxon_252            |      |      |      |      |      |      |      |      |       |       |
| Treponema sp._oral_taxon_254            | 76   | 132  | 88   | 138  | 82   | 84   | 77   | 41   | 53    | 66    |
| Treponema sp._oral_taxon_255            |      |      |      |      |      |      |      |      |       |       |
| Treponema sp._oral_taxon_257            | 83   | 125  | 0    | 0    | 3    | 6    | 3    | 6    | 0     | 0     |
| Treponema sp._oral_taxon_258            | 519  | 196  | 415  | 205  | 532  | 207  | 220  | 115  | 303   | 210   |
| Treponema sp._oral_taxon_263            | 110  | 174  | 123  | 97   | 209  | 126  | 84   | 78   | 187   | 227   |
| Treponema sp._oral_taxon_270            | 416  | 616  | 77   | 51   | 167  | 153  | 492  | 995  | 317   | 391   |
| Treponema sp._oral_taxon_271            | 89   | 57   | 43   | 27   | 100  | 42   | 40   | 36   | 37    | 22    |
| Treponema sp._oral_taxon_508            | 93   | 173  | 244  | 179  | 372  | 321  | 95   | 86   | 132   | 119   |
| Veillonella_unclassified                | 3756 | 3905 | 4246 | 4210 | 801  | 962  | 3570 | 3455 | 2783  | 3278  |
| Veillonellaceae_[G-1]_unclassified      | 353  | 1509 | 1327 | 1581 | 636  | 568  | 380  | 442  | 923   | 863   |
| Veillonellaceae_[G-1]sp._oral_taxon_129 | 1749 | 439  | 85   | 165  | 23   | 23   | 152  | 182  | 323   | 632   |
| Veillonellaceae_[G-1]sp._oral_taxon_145 | 241  | 218  | 191  | 228  | 723  | 447  | 503  | 295  | 514   | 862   |
| Veillonellaceae_[G-1]sp._oral_taxon_155 | 2050 | 1843 | 177  | 378  | 851  | 1832 | 301  | 538  | 564   | 952   |
| Veillonellaceae_unclassified            | 69   | 4    | 3    | 4    | 2    | 1    | 44   | 97   | 4     | 5     |
| Veillonella dispar_oral_taxon_160       | 118  | 6436 | 3192 | 7046 | 18   | 25   | 185  | 347  | 371   | 546   |
| Veillonella parvula_oral_taxon_161      | 6098 | 8756 | 8301 | 9527 | 2189 | 3793 | 6608 | 6503 | 12214 | 20234 |
| Veillonella sp._oral_taxon_780          | 30   | 12   | 7    | 10   | 2    | 4    | 5    | 5    | 46    | 47    |

29  
30  
31  
32

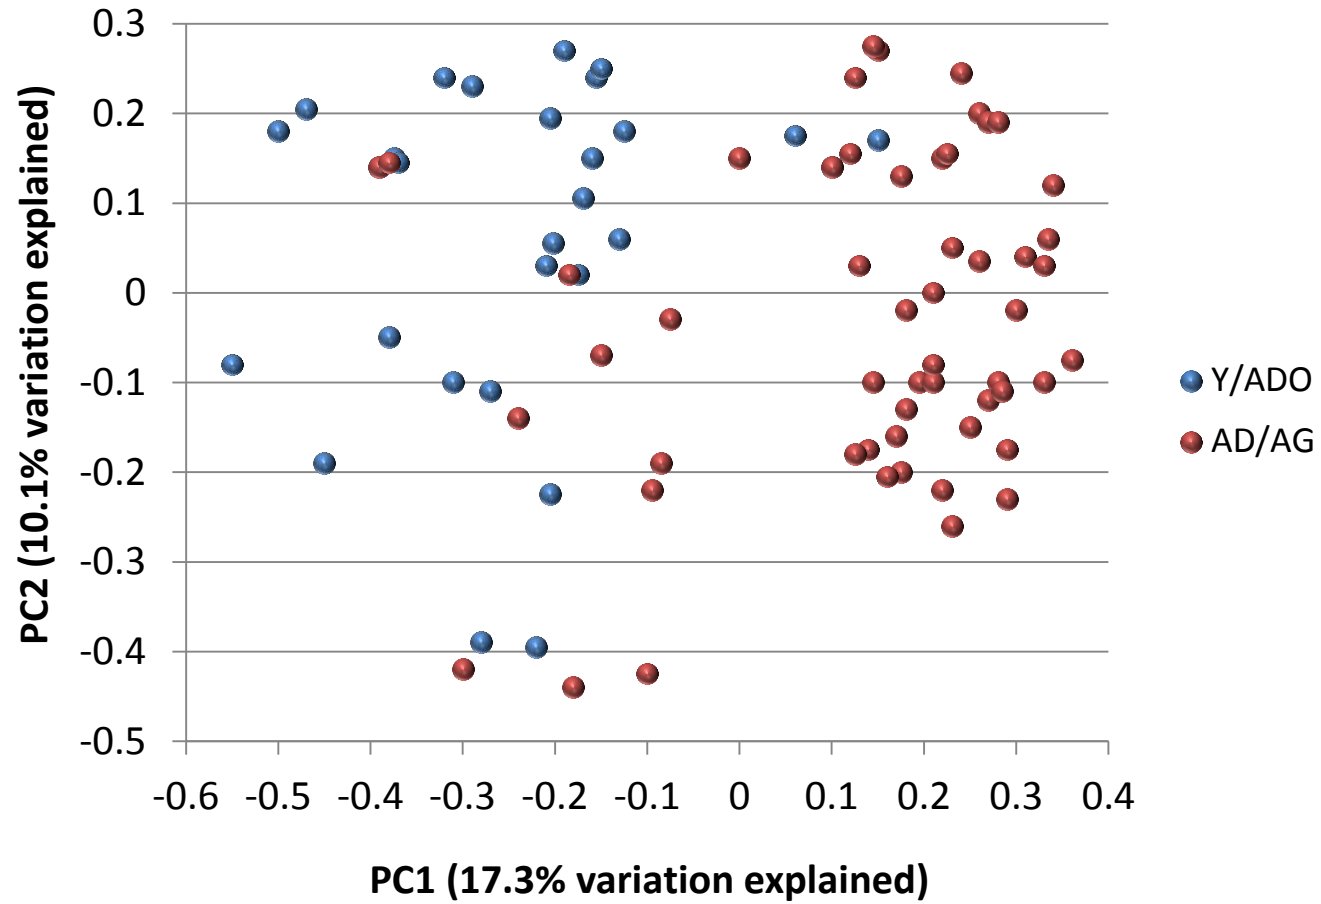

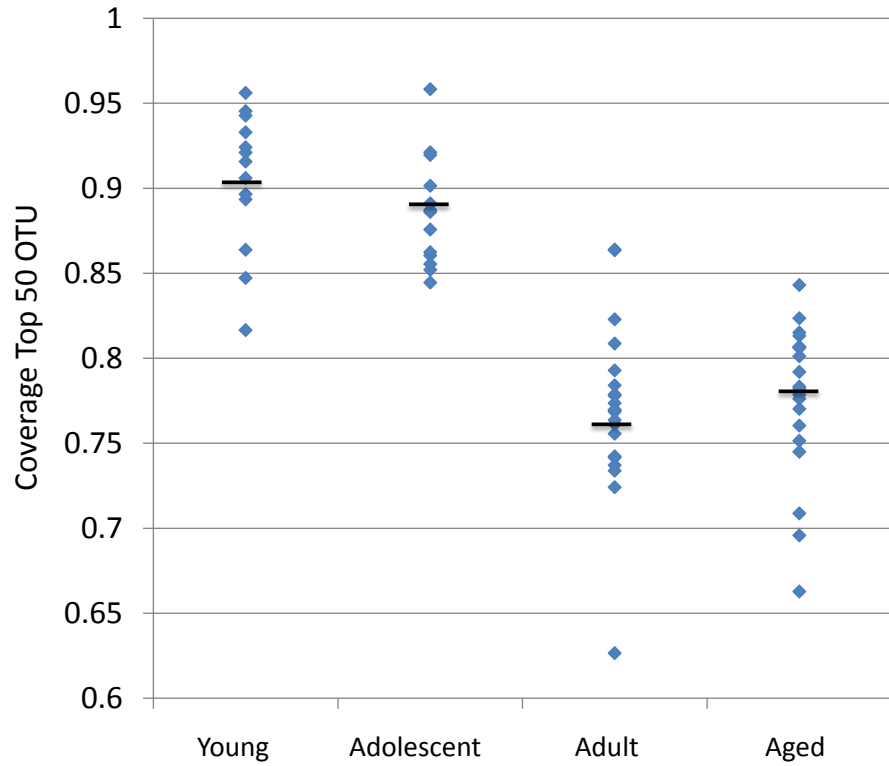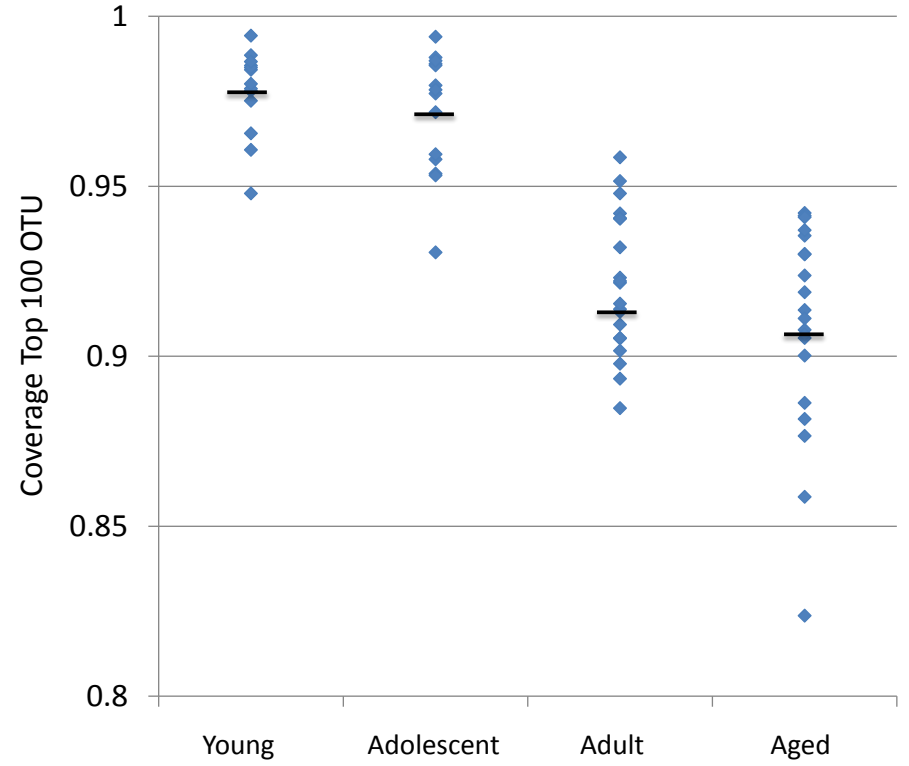



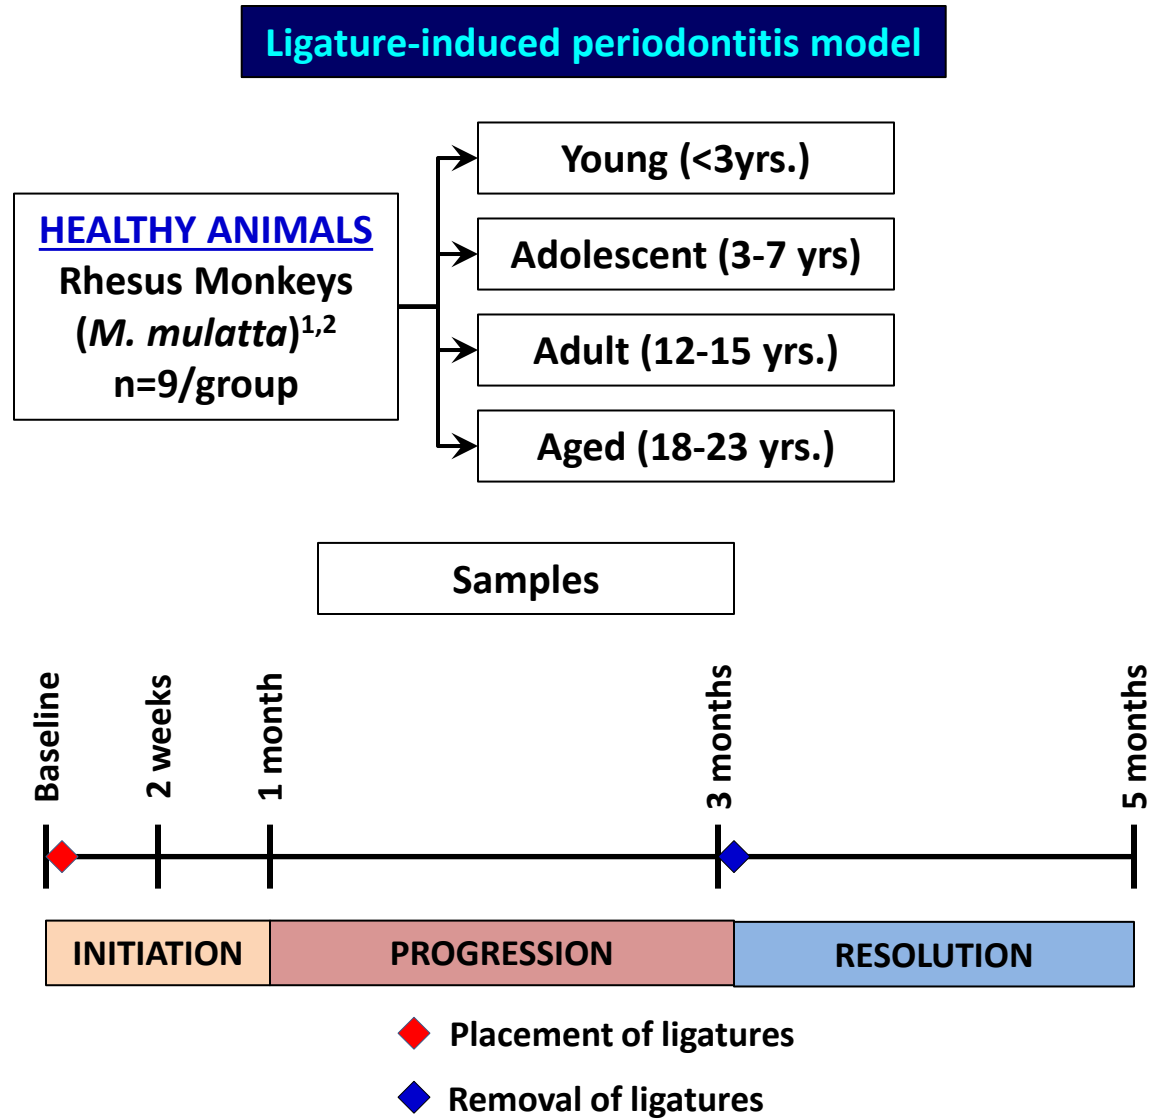

Supplement: IAI.00067-19-s0001.pdf [file IAI.00067-19-s0001.pdf]
